# Supplementary material for: Synthesis of α-haloenamides via zinc halide mediated direct addition of benzhydryl halides to ynamides
Source: Royal Society of Chemistry journal article supplement (doi:10.1039/c5ob01950h), 2015-10-21

## Synthesis of $\alpha$ -Haloenamides via Zinc Halide Mediated Direct

### Addition of Benzyl Halides to Ynamides

Ling Chen, Lian Yu, Yuan Deng, Yuming Cui, Gaofeng Bian, and Jian Cao\*

*Key Laboratory of Organosilicon Chemistry and Material Technology of Ministry of Education, Hangzhou Normal University, No 1378, Wenyi West Road, Science Park of HZNU, Hangzhou (P.R. China)*

| <b>Table of Contents</b>                                     |        |
|--------------------------------------------------------------|--------|
| NMR spectra of new compounds                                 | S2-S35 |
| ORTEP representation of <b>3a</b> , <b>3j'</b> and <b>3m</b> | S36-37 |

XLW-CJ-156  
PROTON CDCl3 ID: V0541693

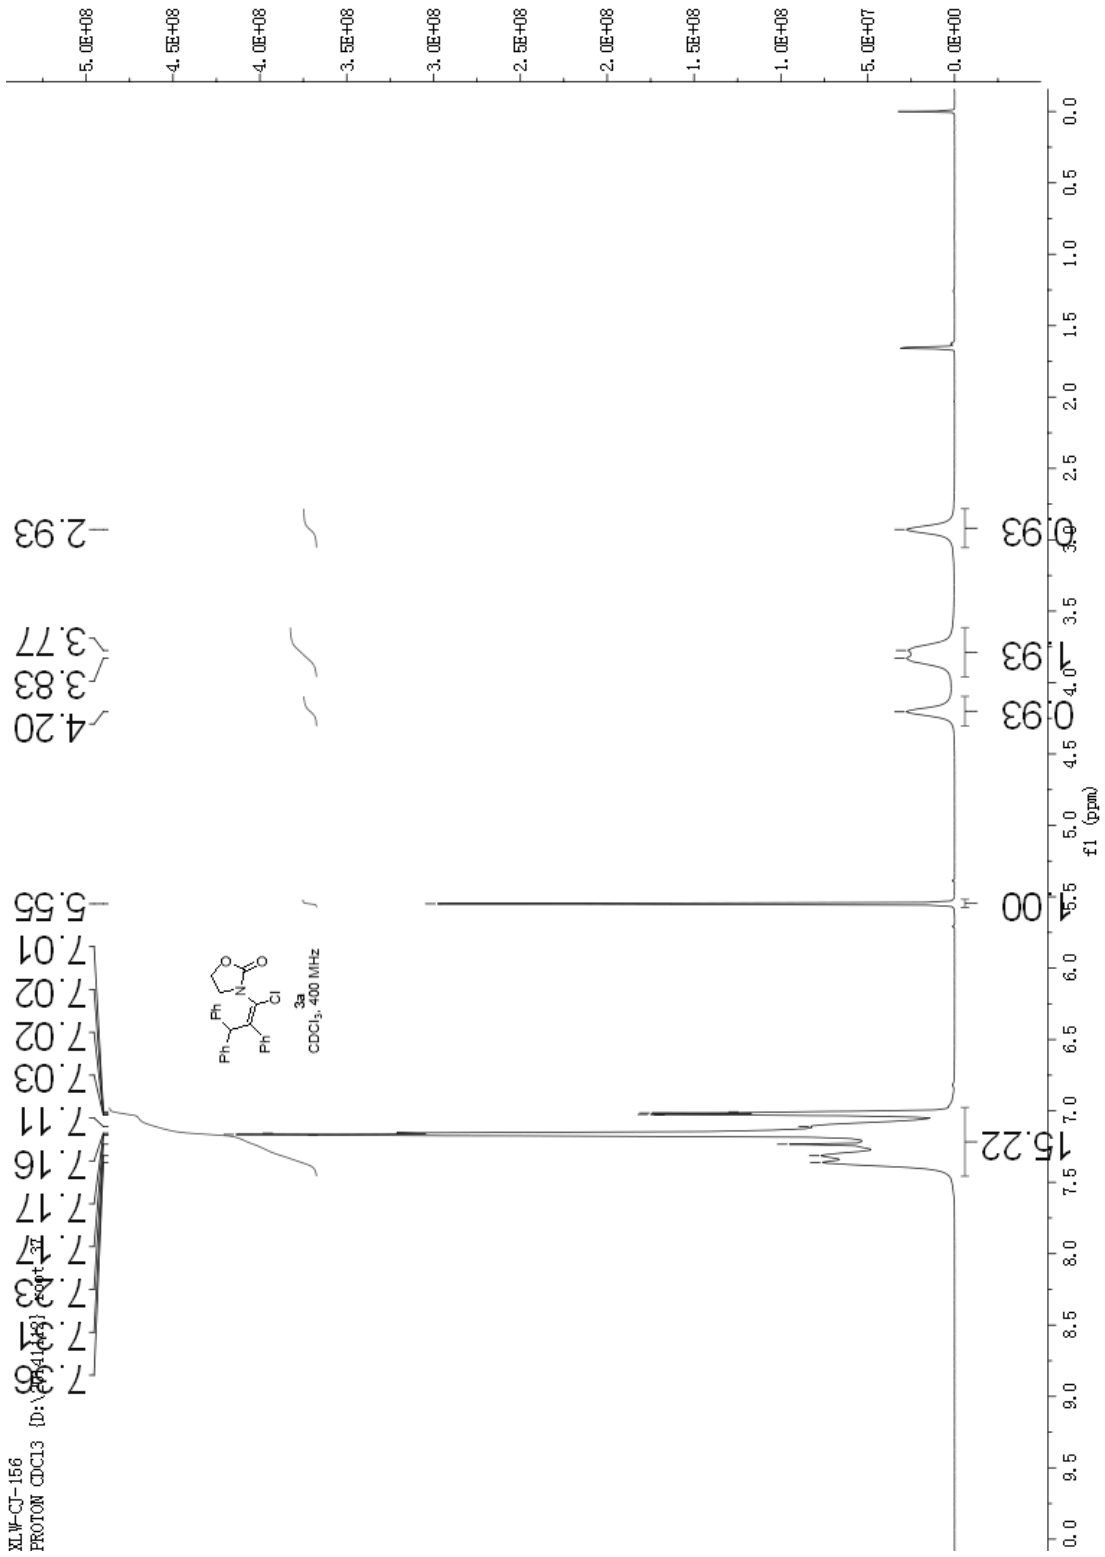

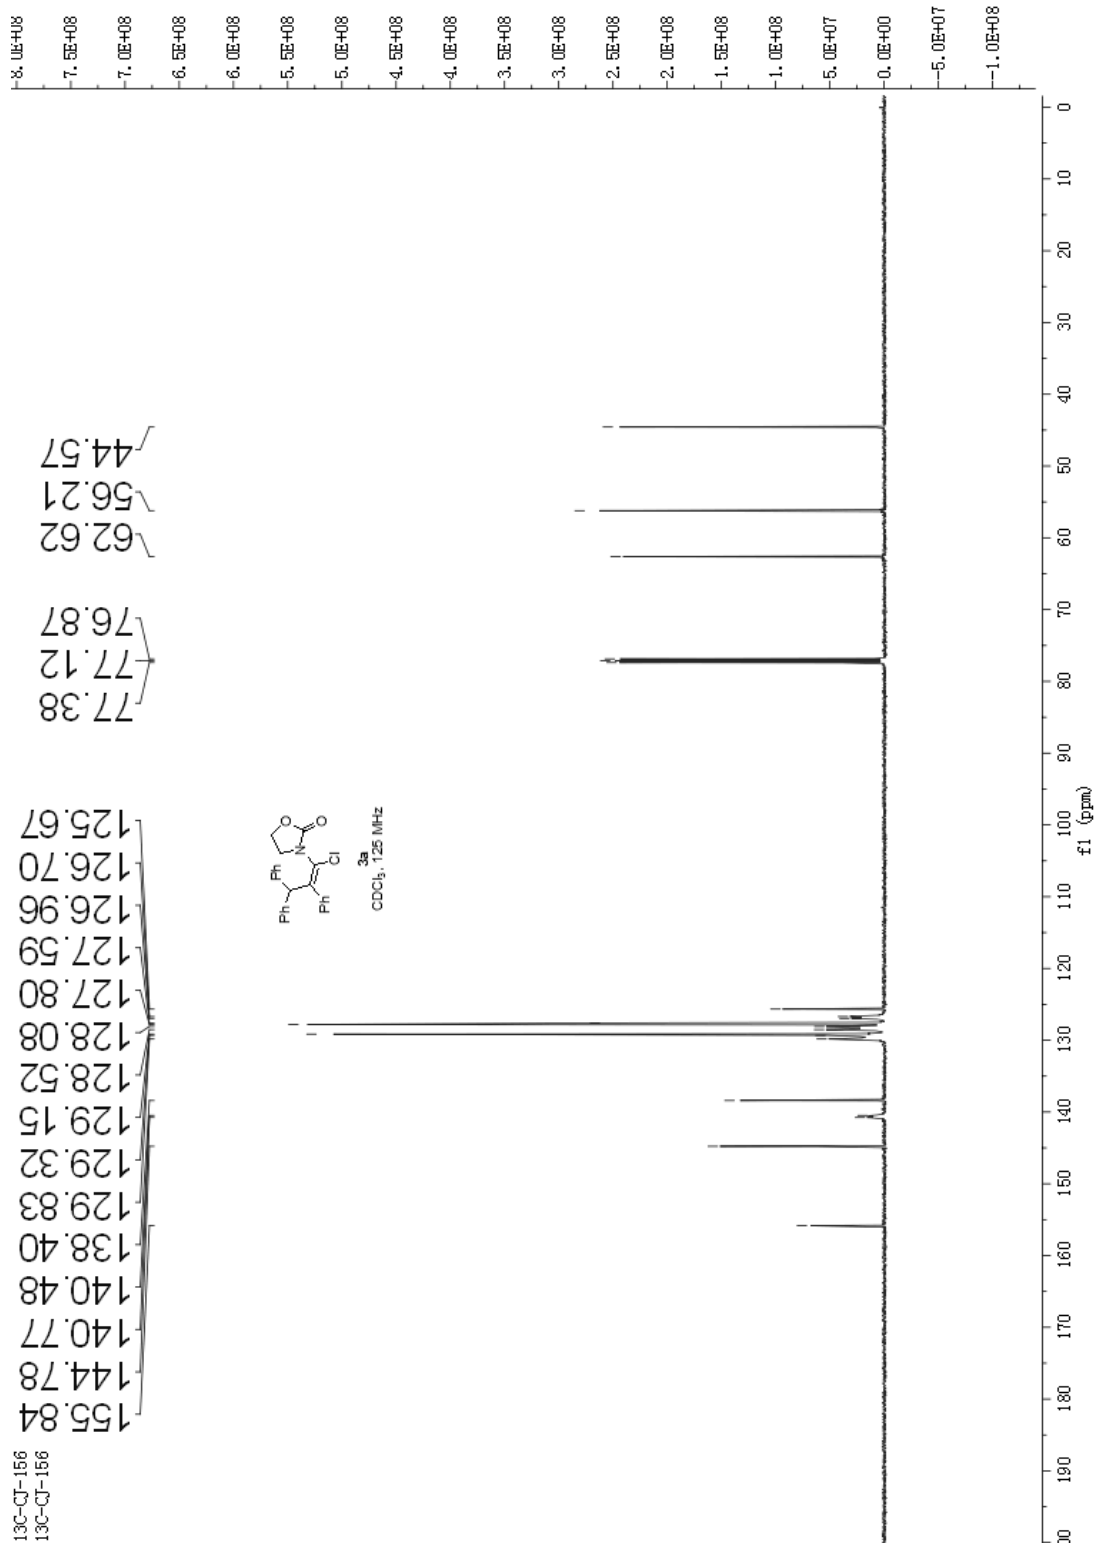

XLW-CJ-222  
PROTON CDCl3 (D:\20141230) root

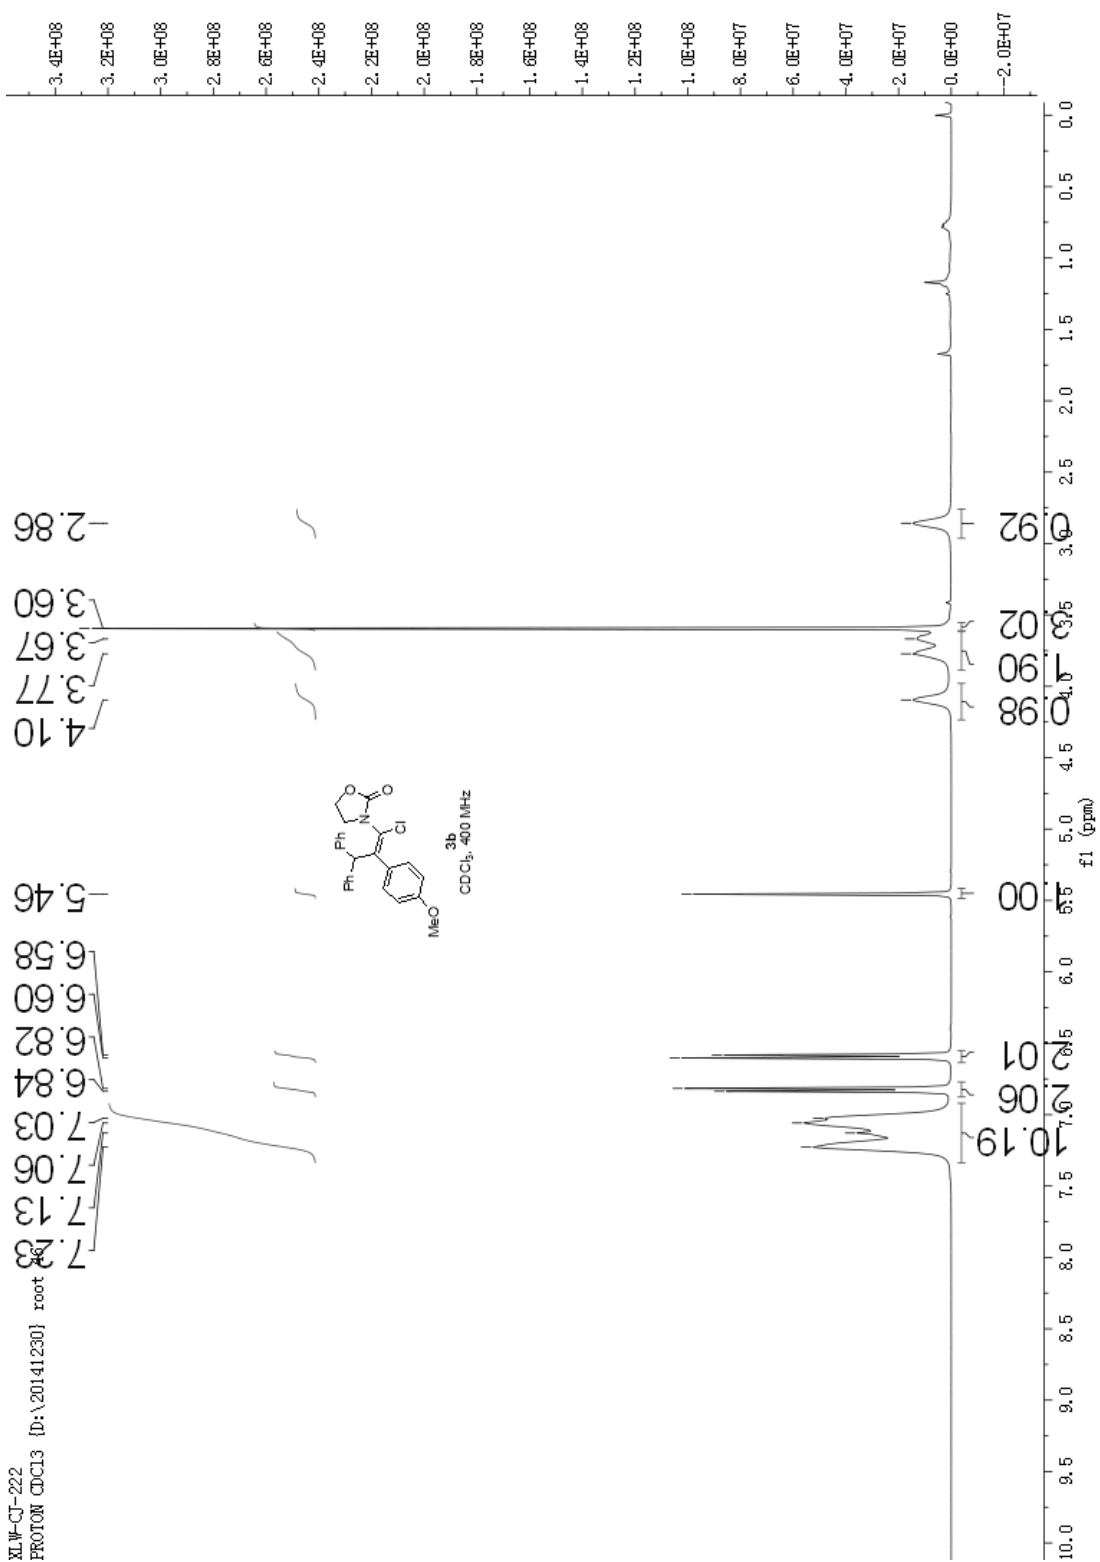

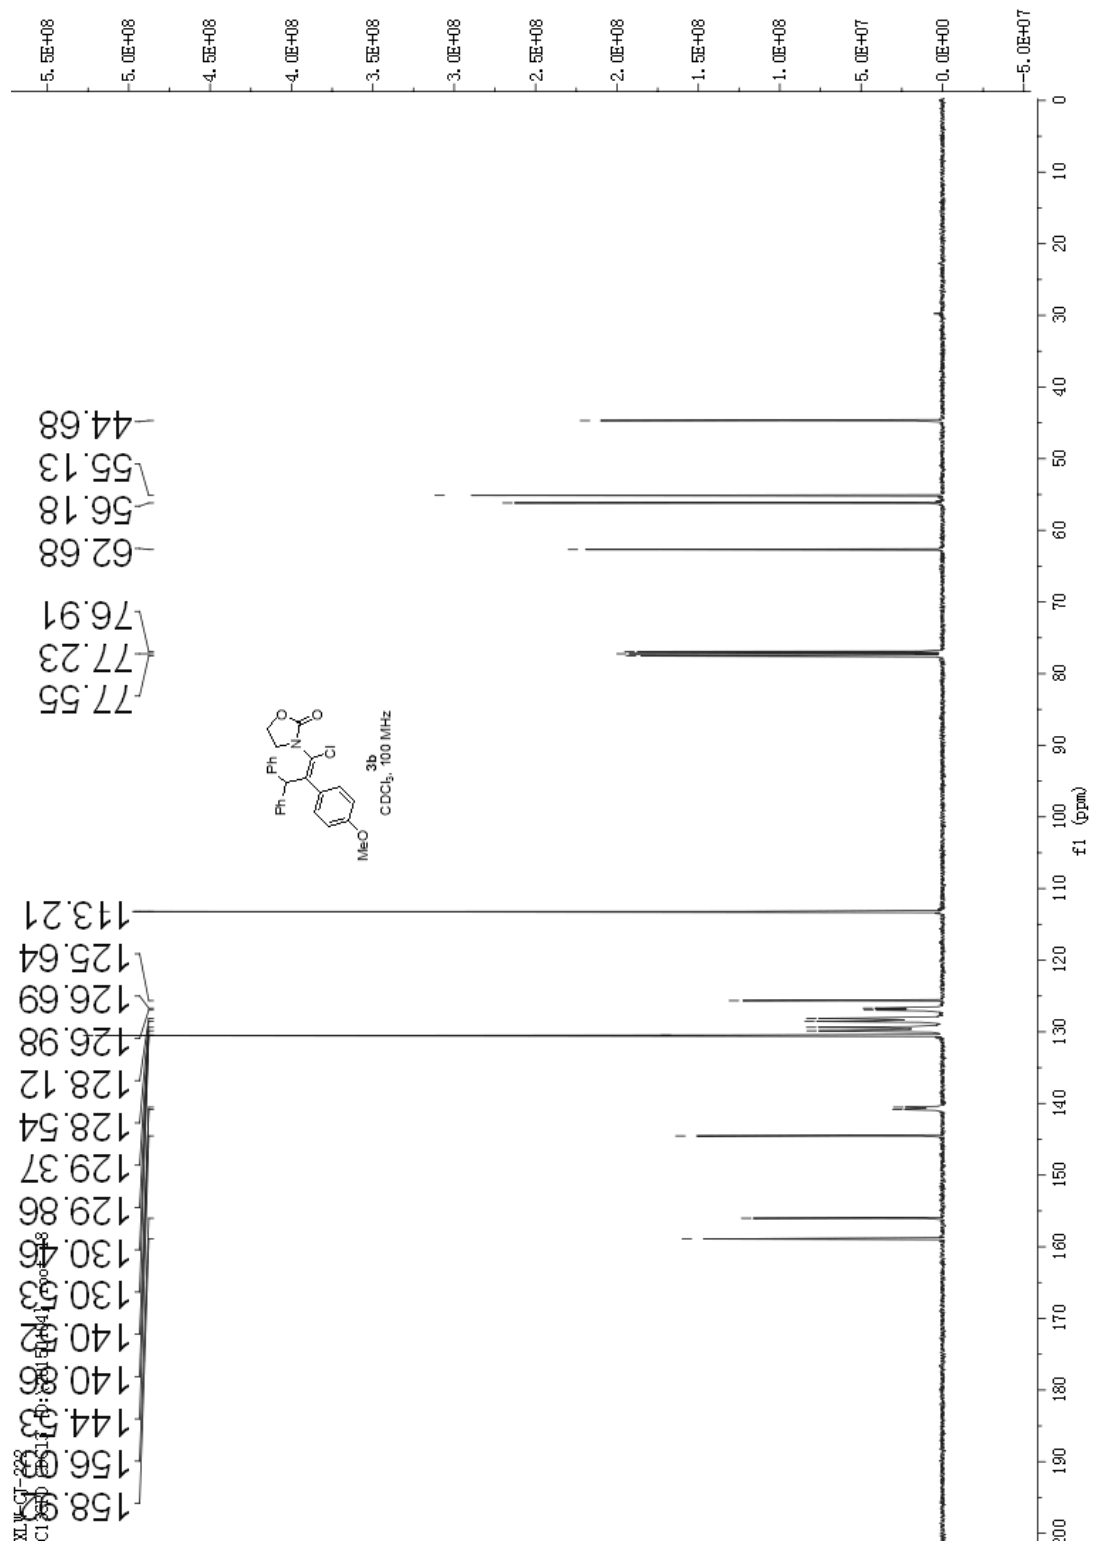

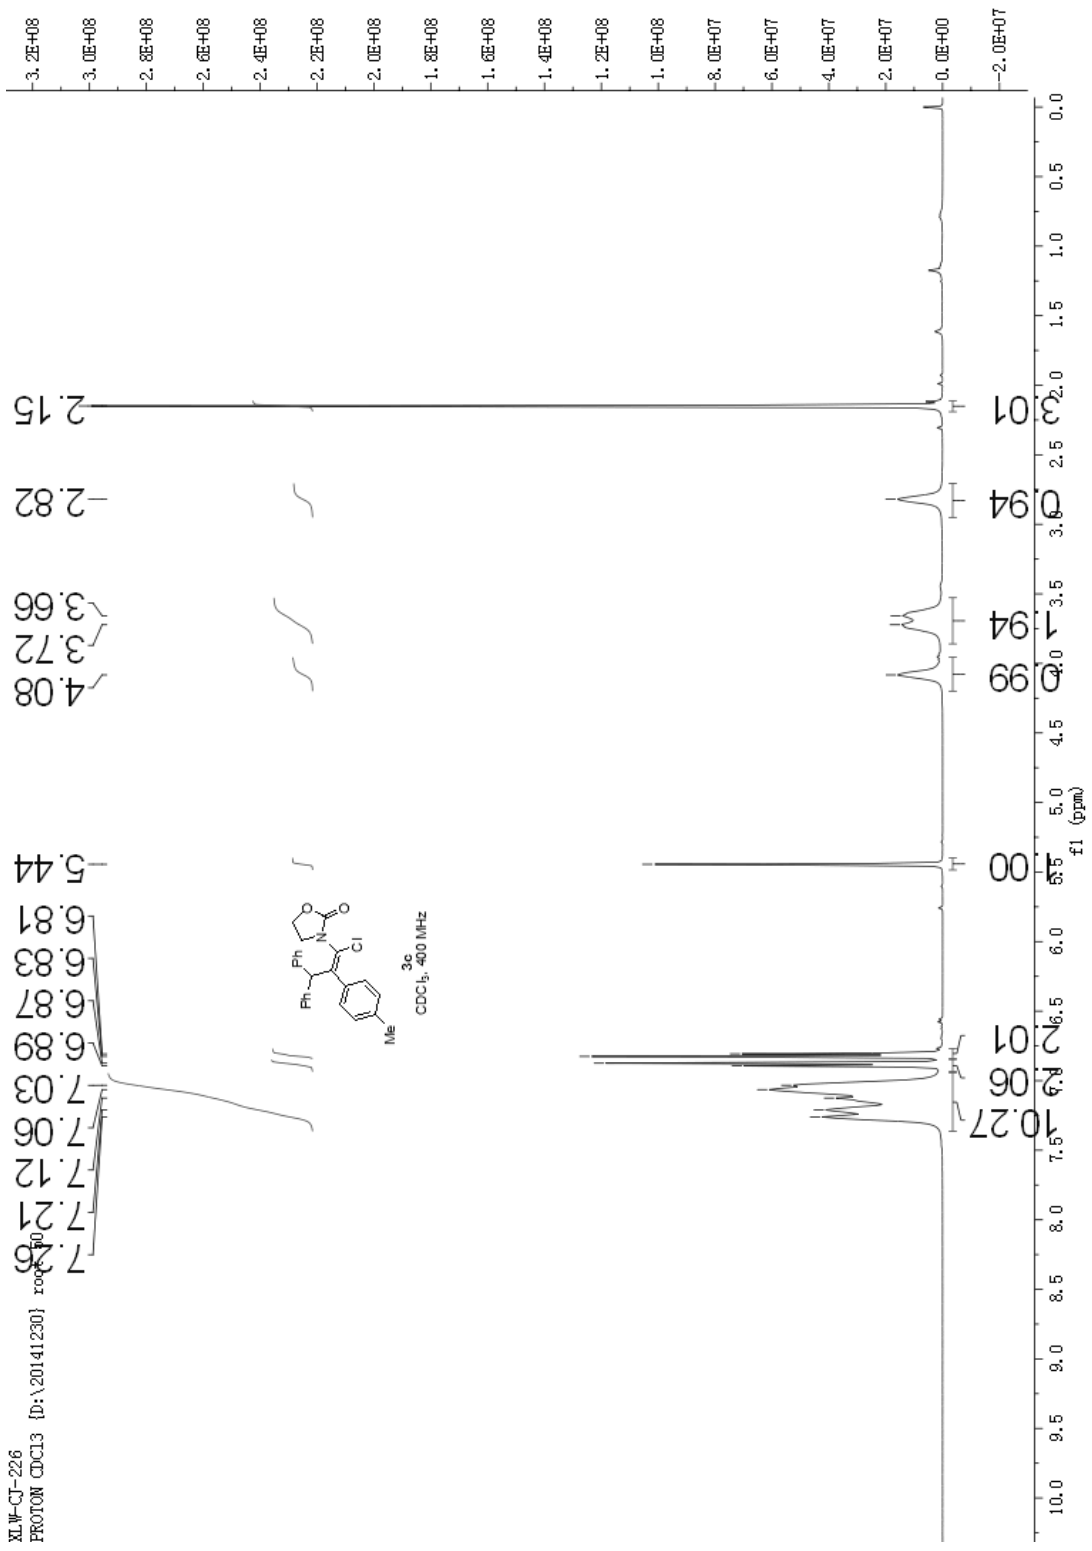

XLW-CJ-226  
C13CPD CDCl3 (D: 291189)

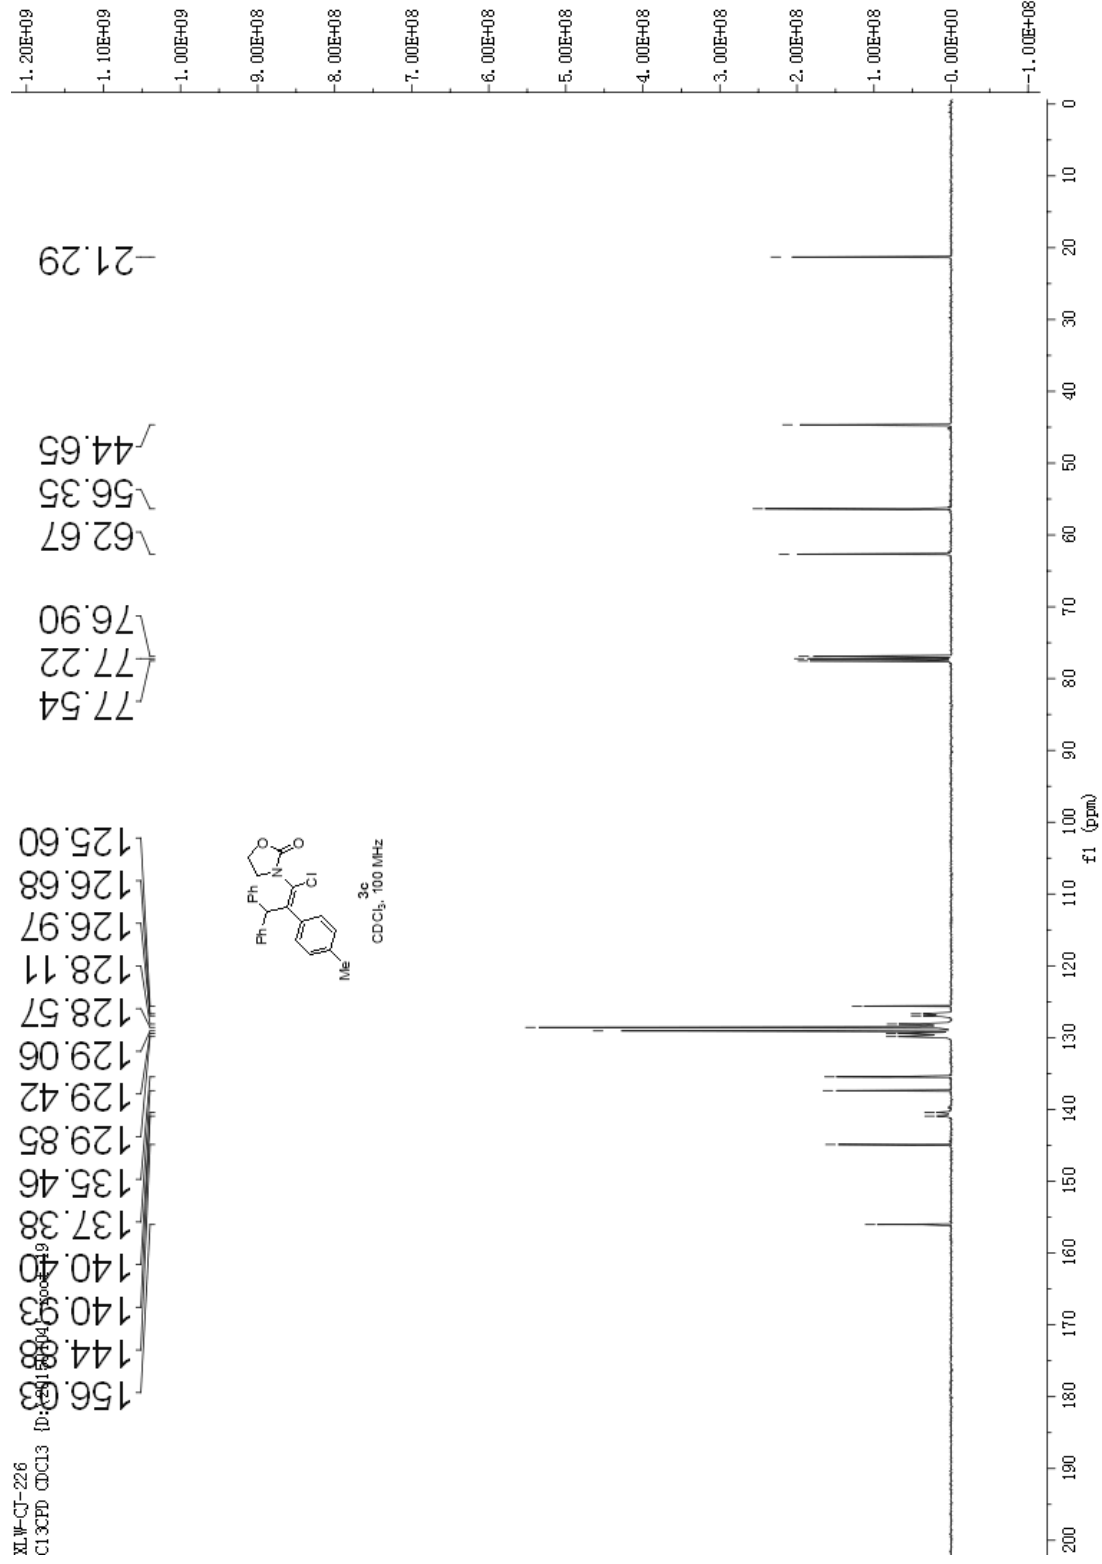

XLW-CJ-233  
PROTON CDCL3 (D:\201508)

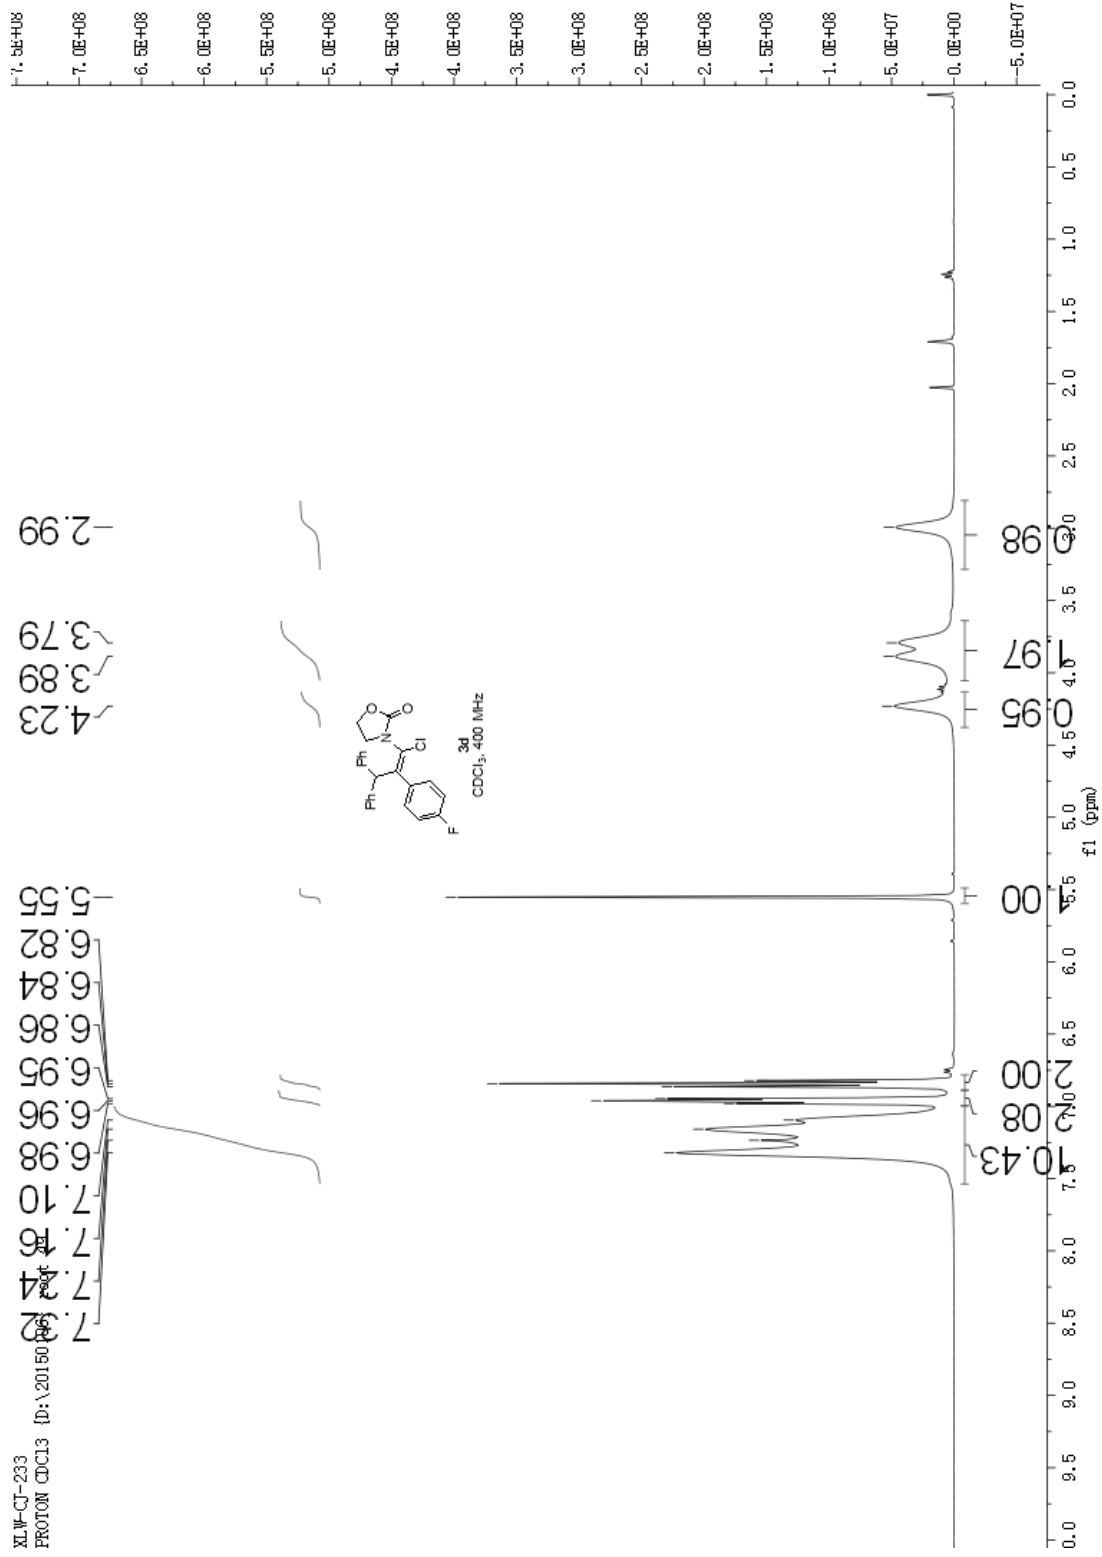



XI.W-CJ-233  
C13CPD CDCl3 (D:\20150107)

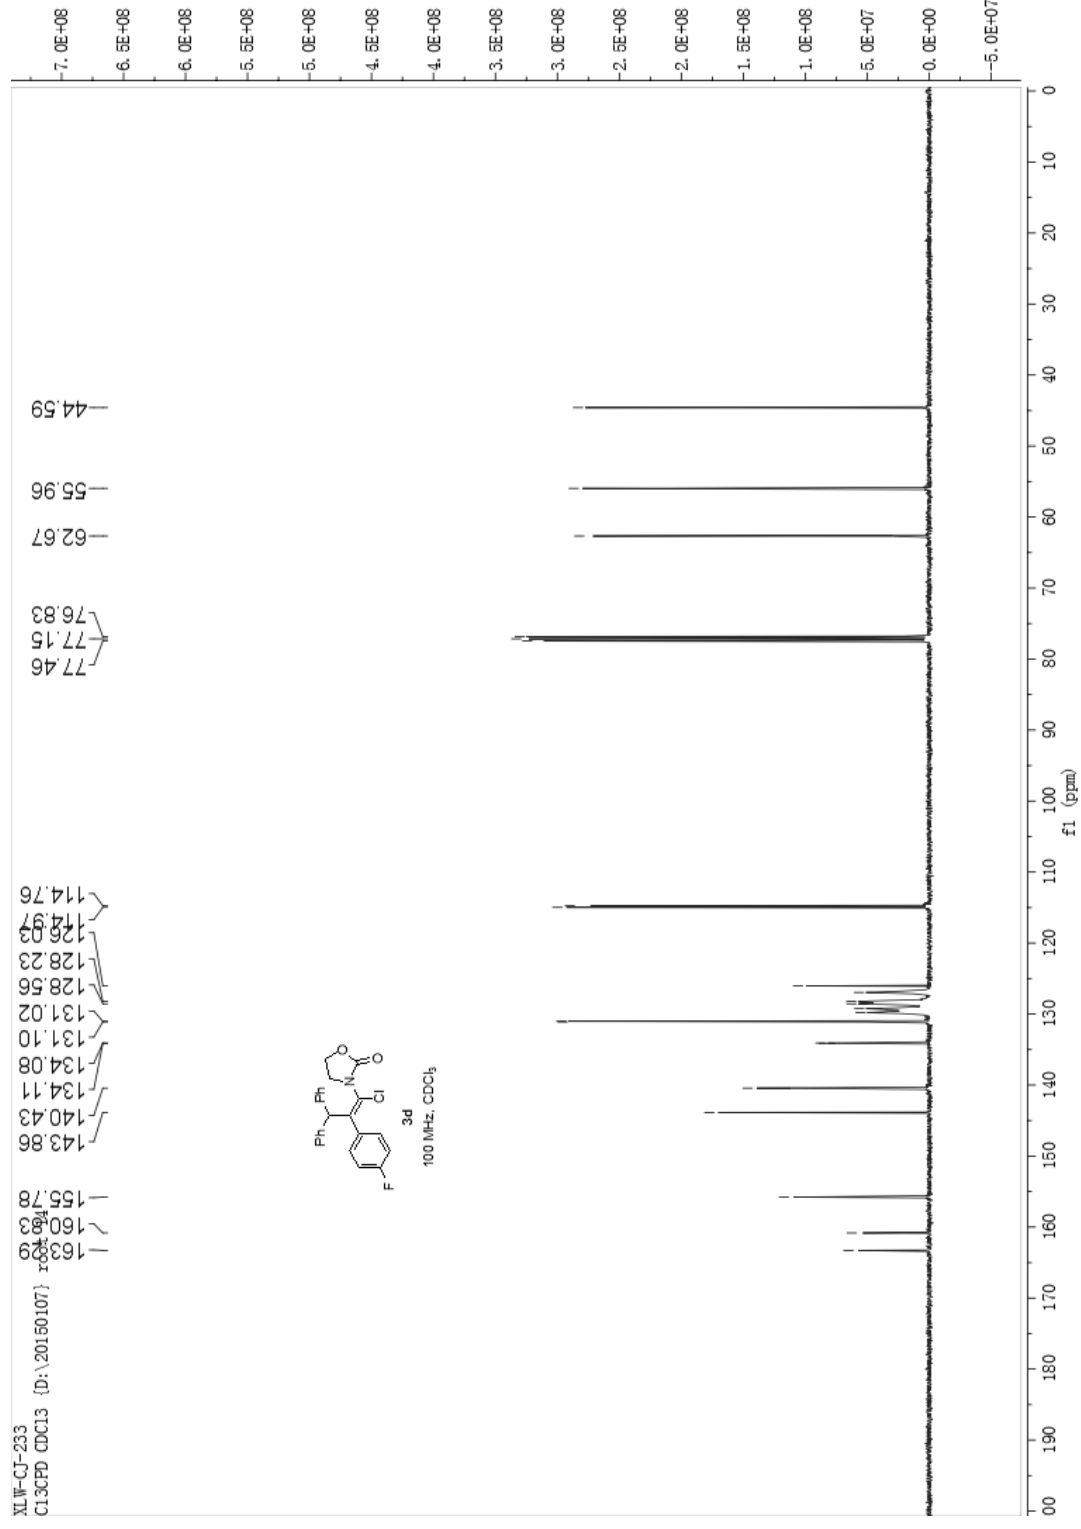



XLW-CJ-356  
C13CFD CDCl3 [D:\20150428] root 17

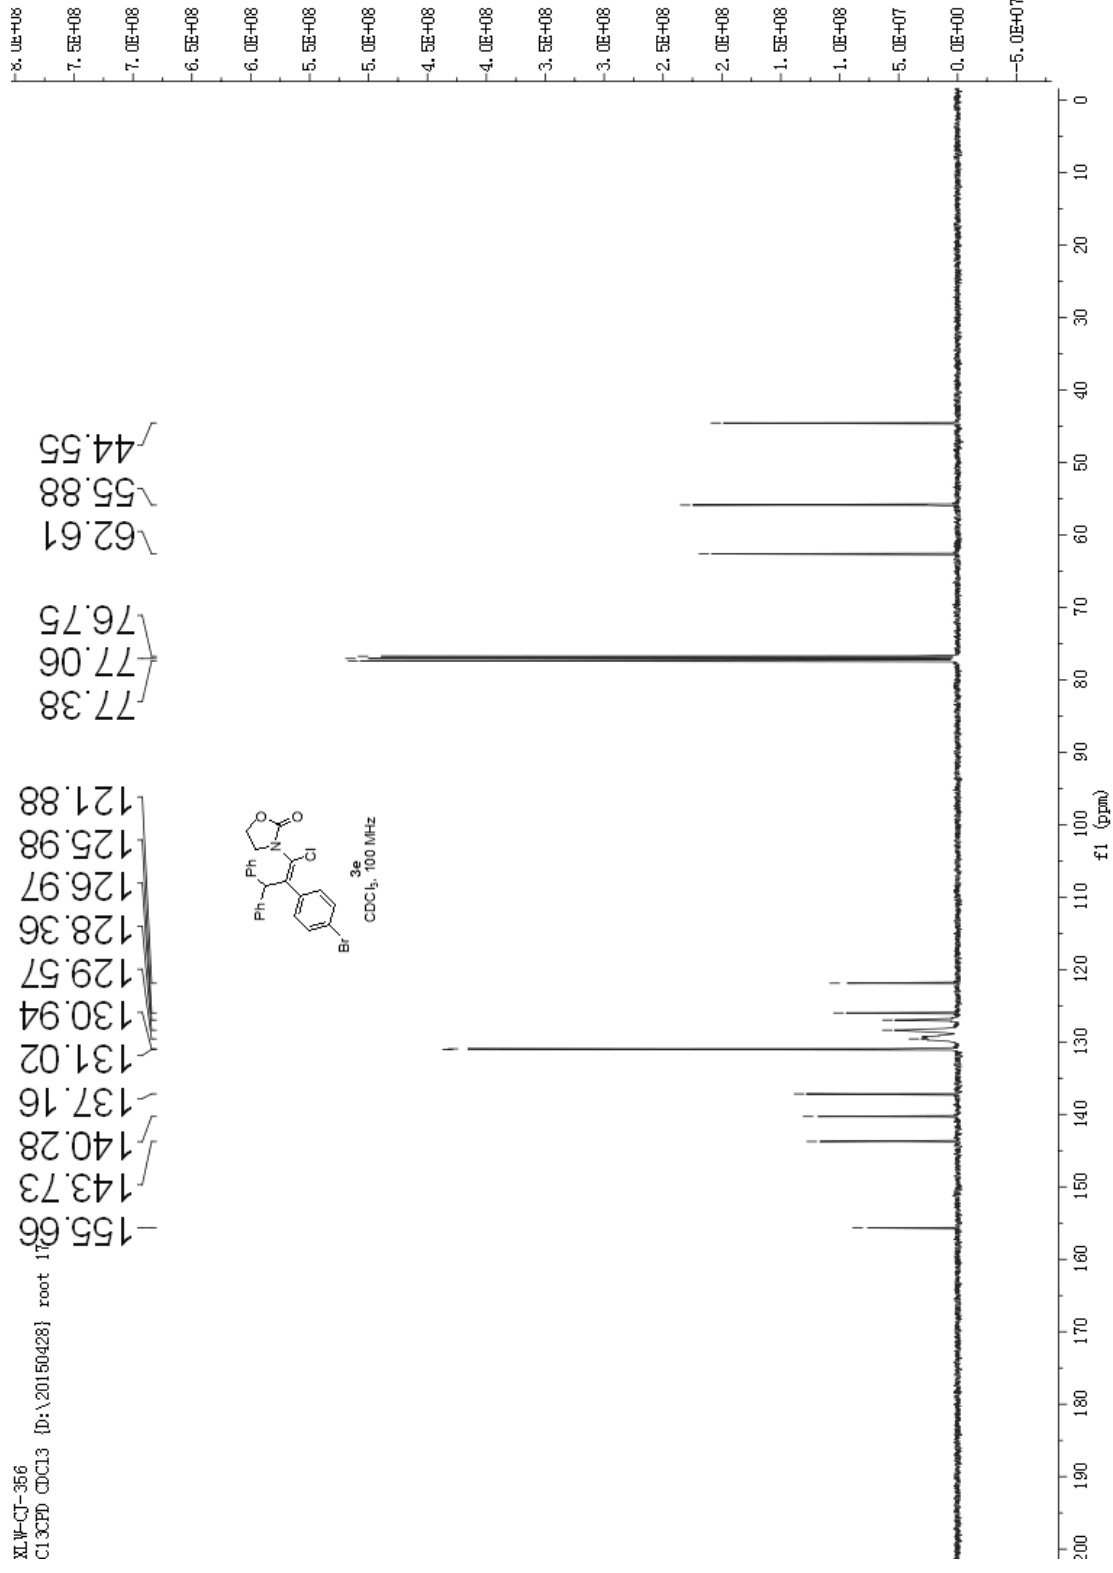

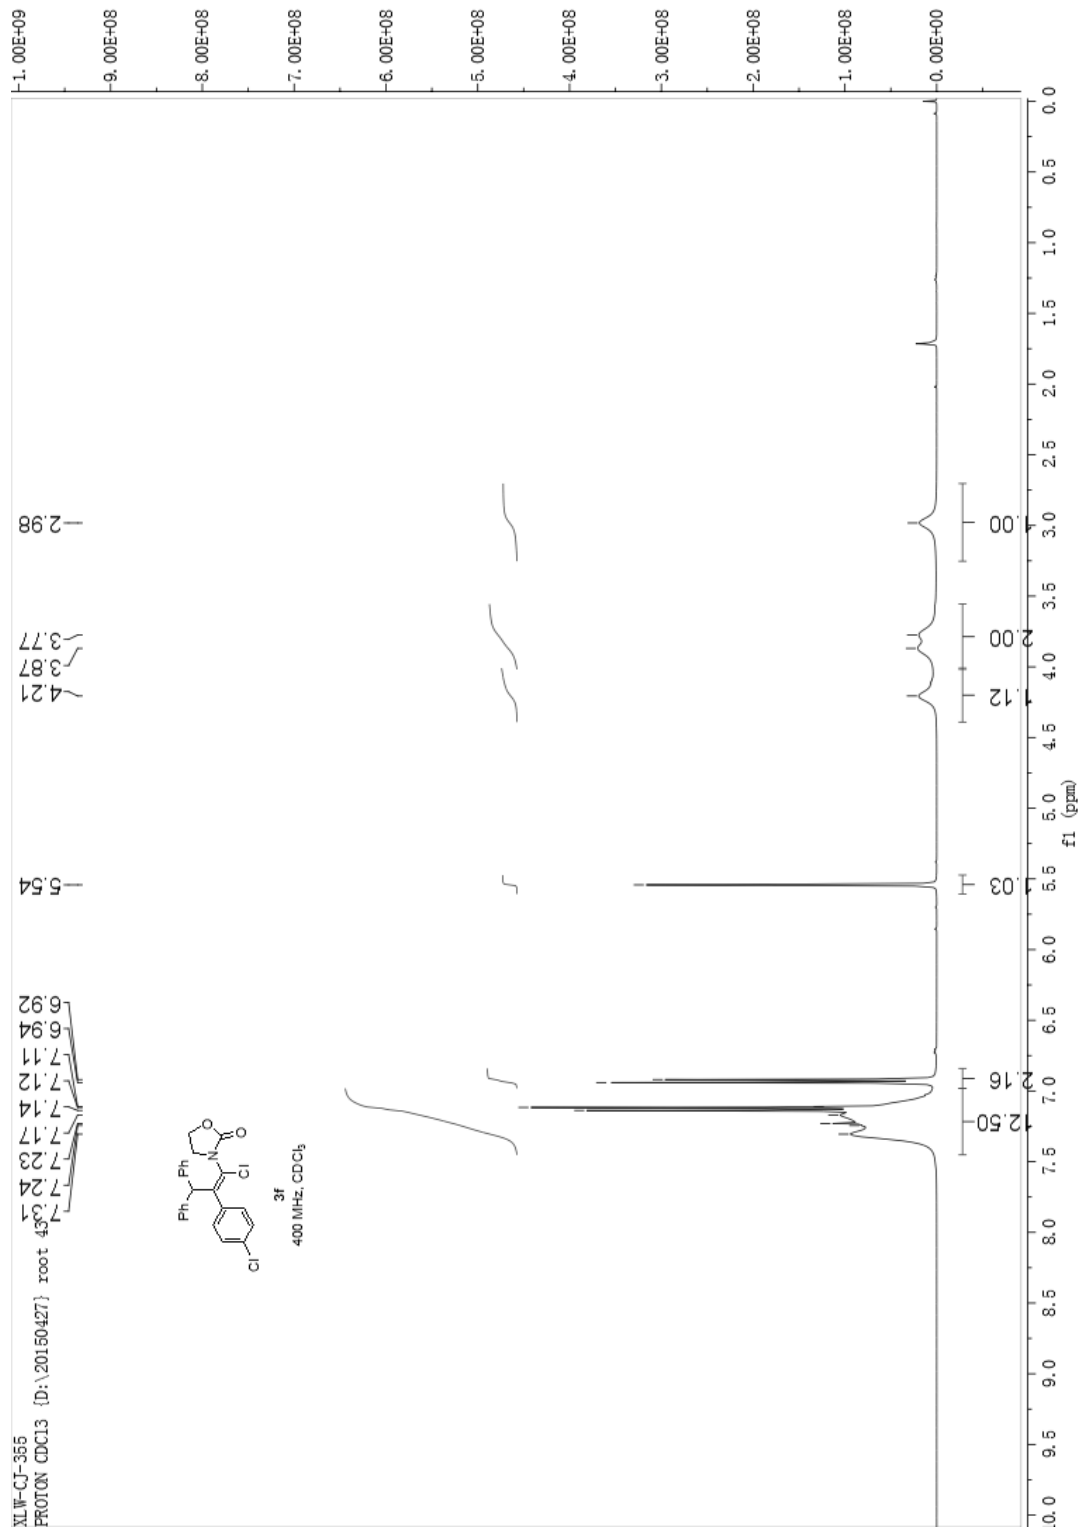

XLW-CJ-365  
C13CPD CDCl3

root 1

{D:\20150428}

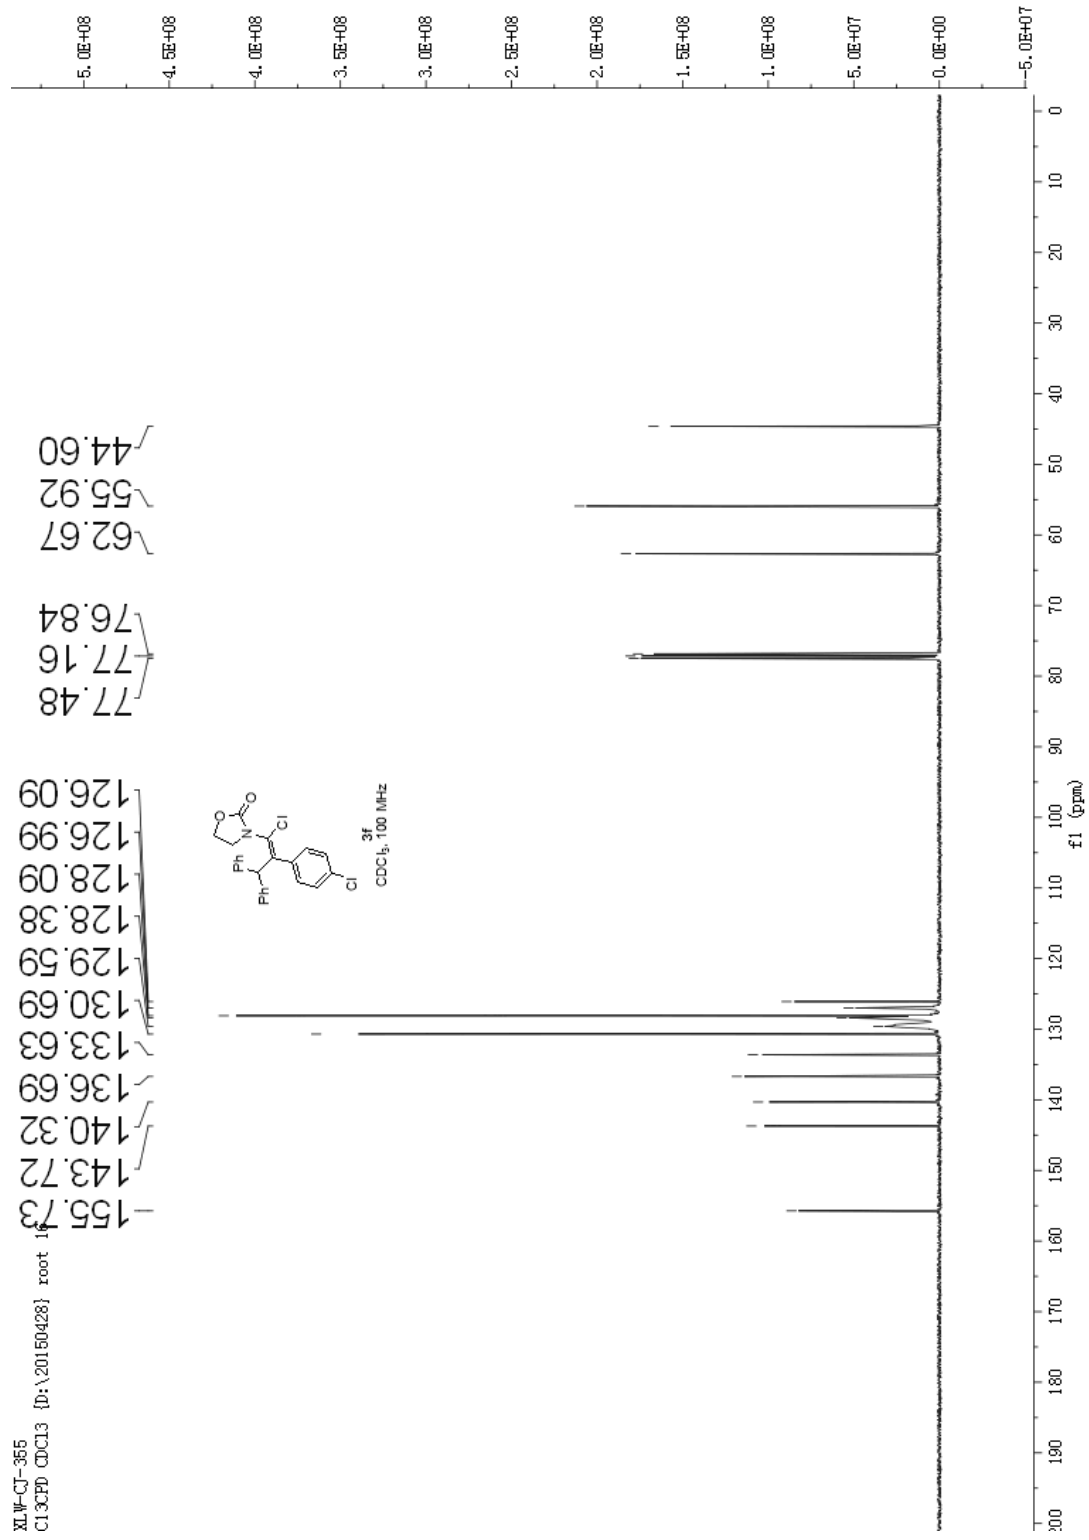

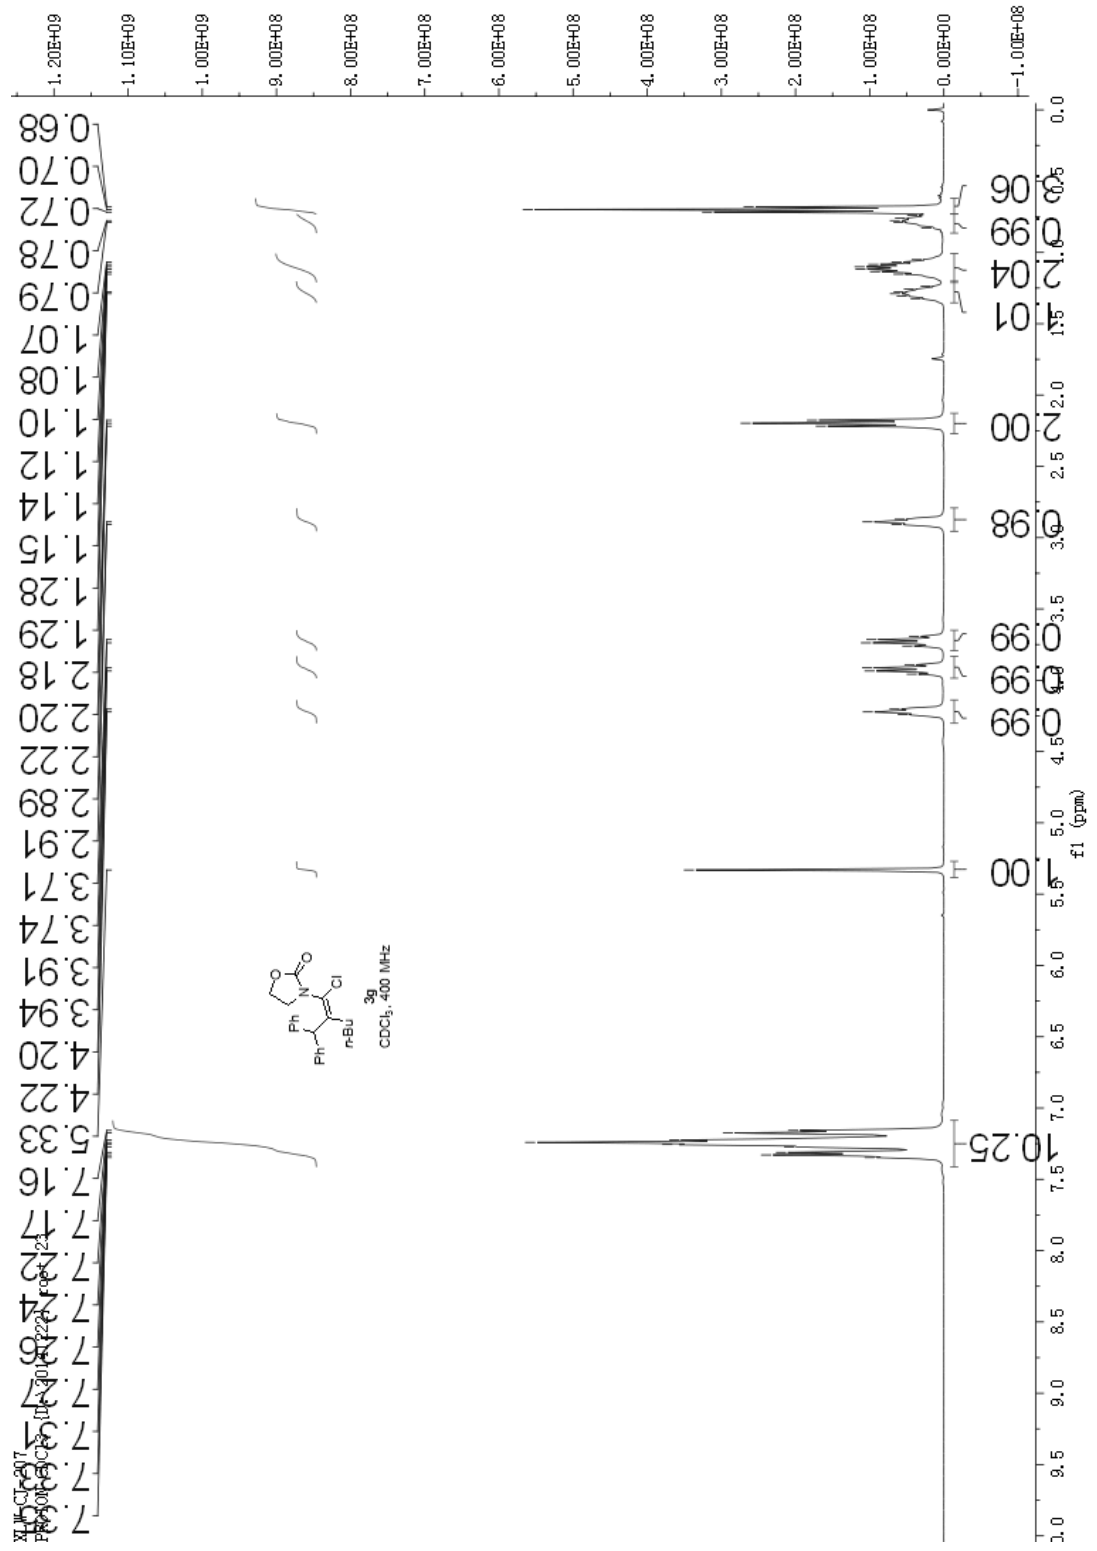

XLW-CJ-2017  
C13CPD CDCl3

ID:\20141224\5000146

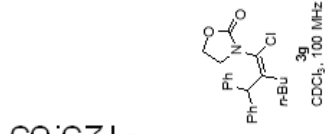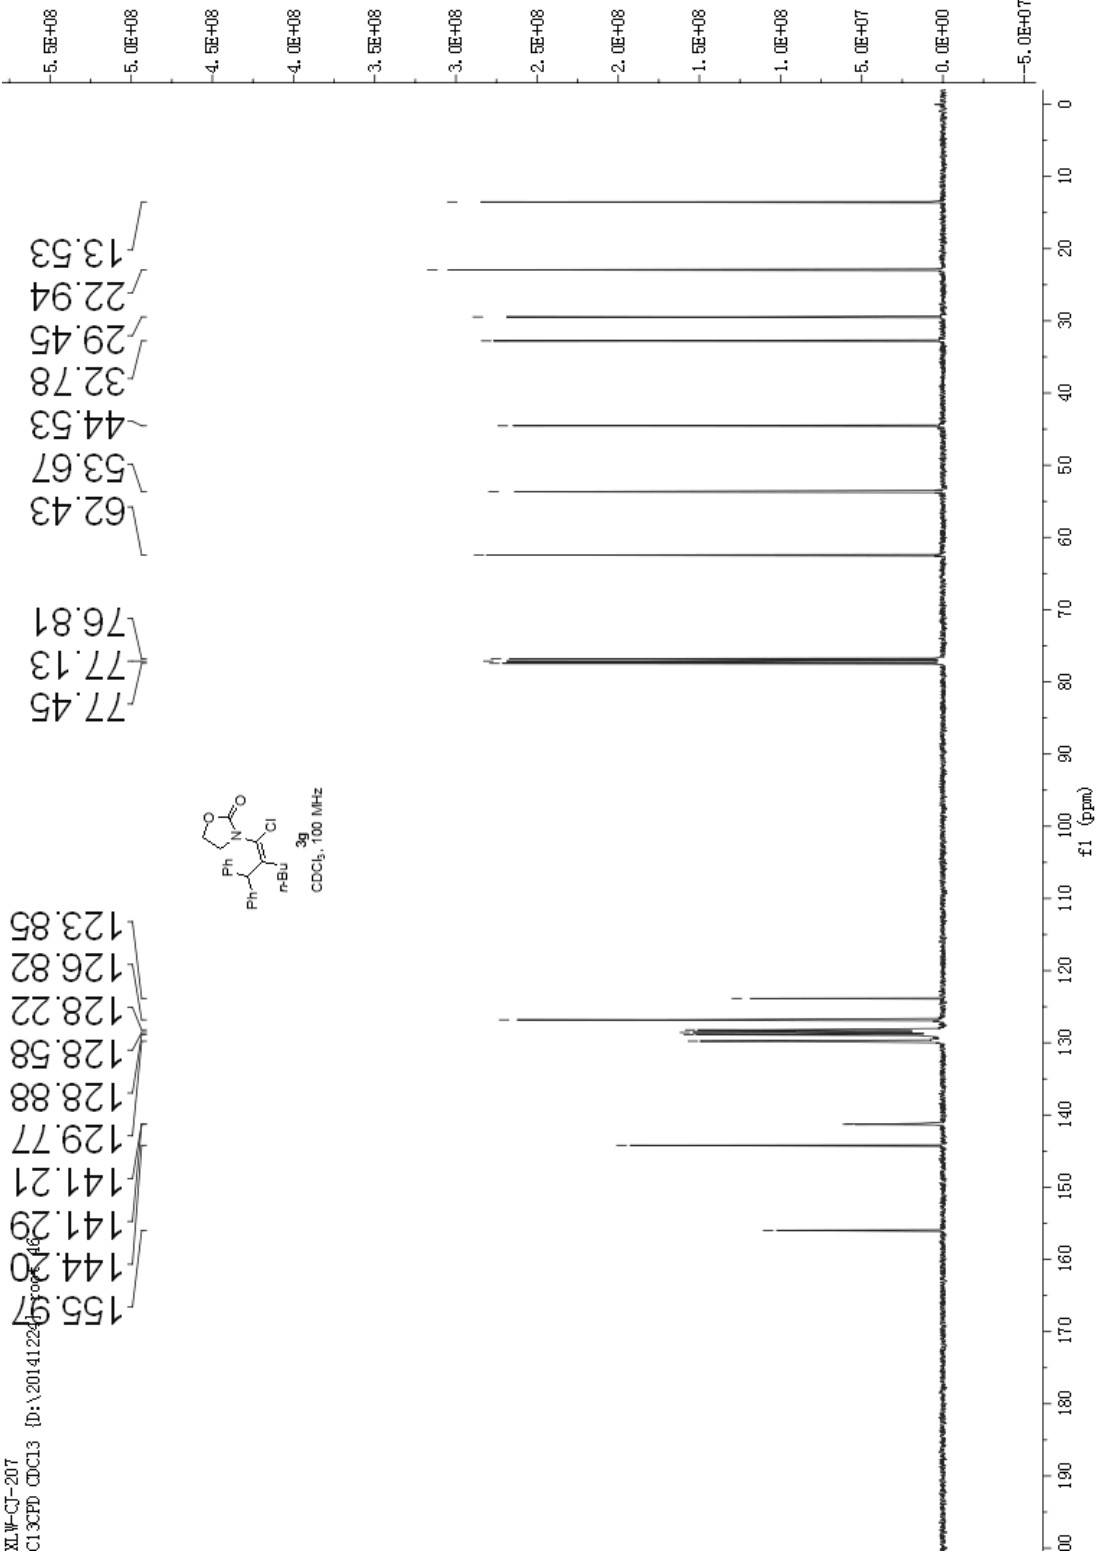

XLW-CJ-353

PROTON CDC13 (D:\20150427)

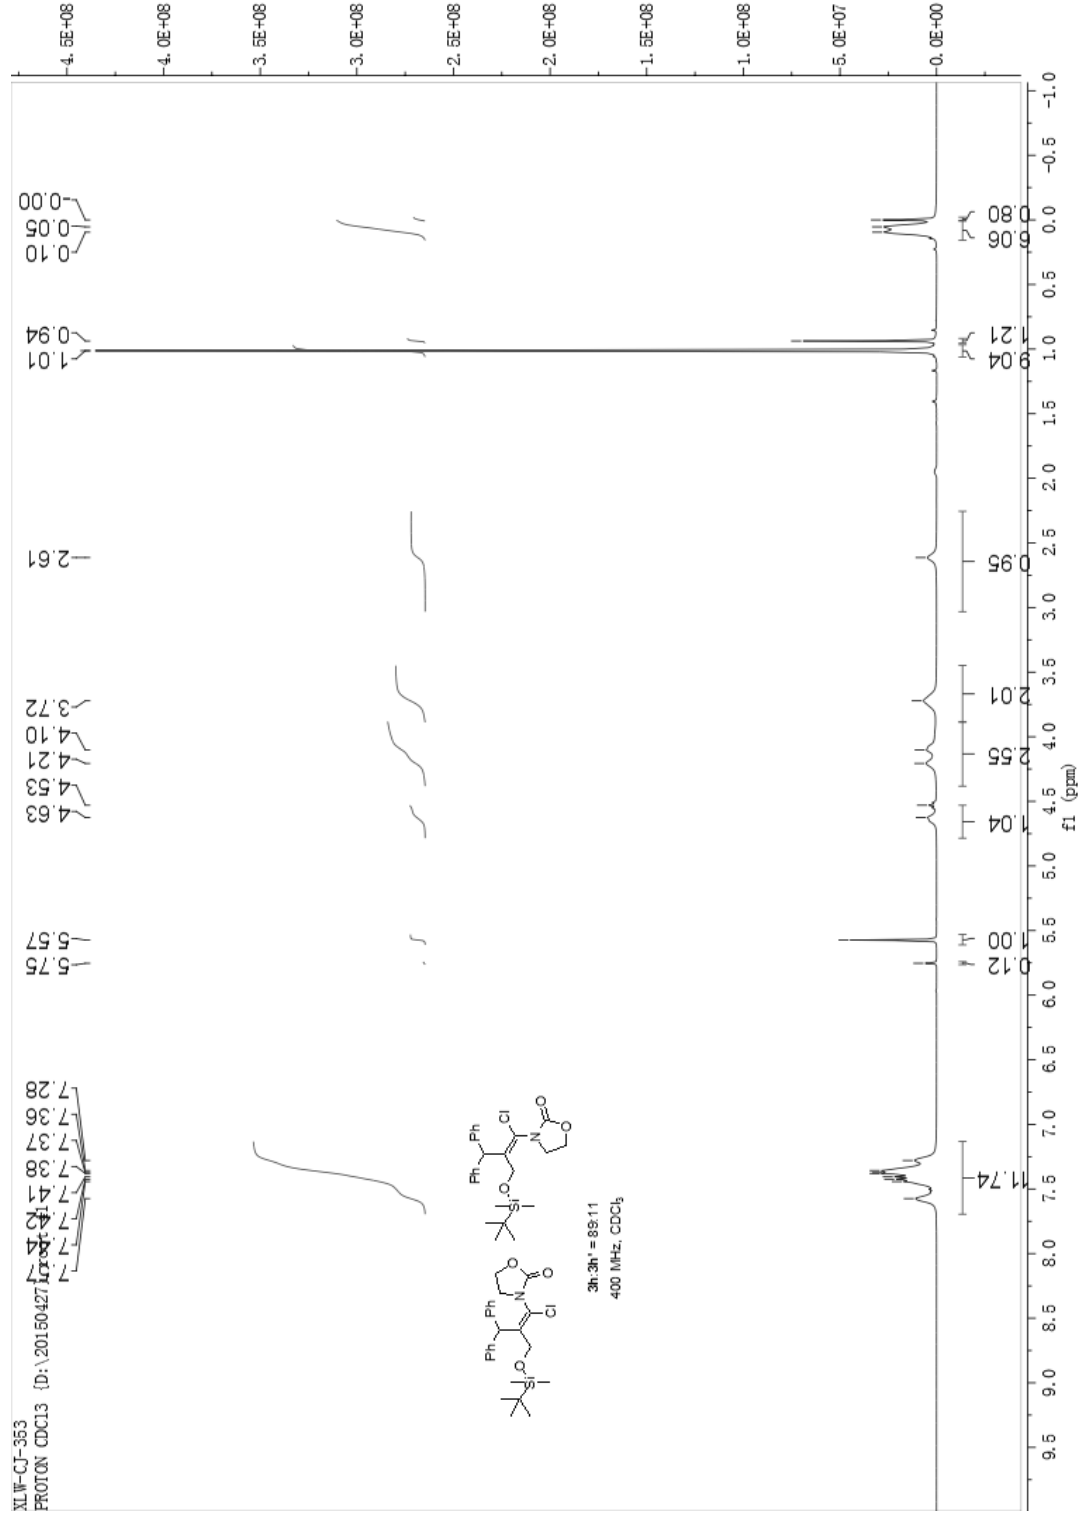



XI.W-CJ-353

C13CPD CDC13 (D:\20150428) root

155.52  
142.76  
141.82  
141.28  
129.56  
129.42  
128.34  
126.70  
126.63  
125.63

77.47  
77.15  
76.83

62.59  
61.92

52.51

44.10

25.90

18.28

5.67  
5.80

8.0E+08

7.5E+08

7.0E+08

6.5E+08

6.0E+08

5.5E+08

5.0E+08

4.5E+08

4.0E+08

3.5E+08

3.0E+08

2.5E+08

2.0E+08

1.5E+08

1.0E+08

5.0E+07

0.0E+00

-5.0E-07

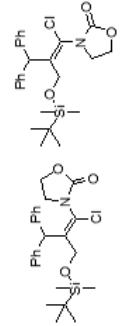

3H, 3H' = 89:11  
100 MHz, CDCl<sub>3</sub>

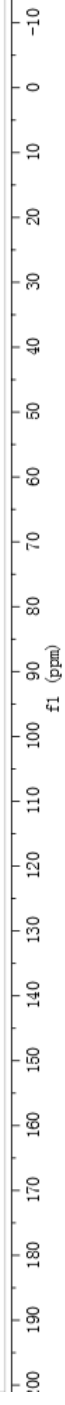

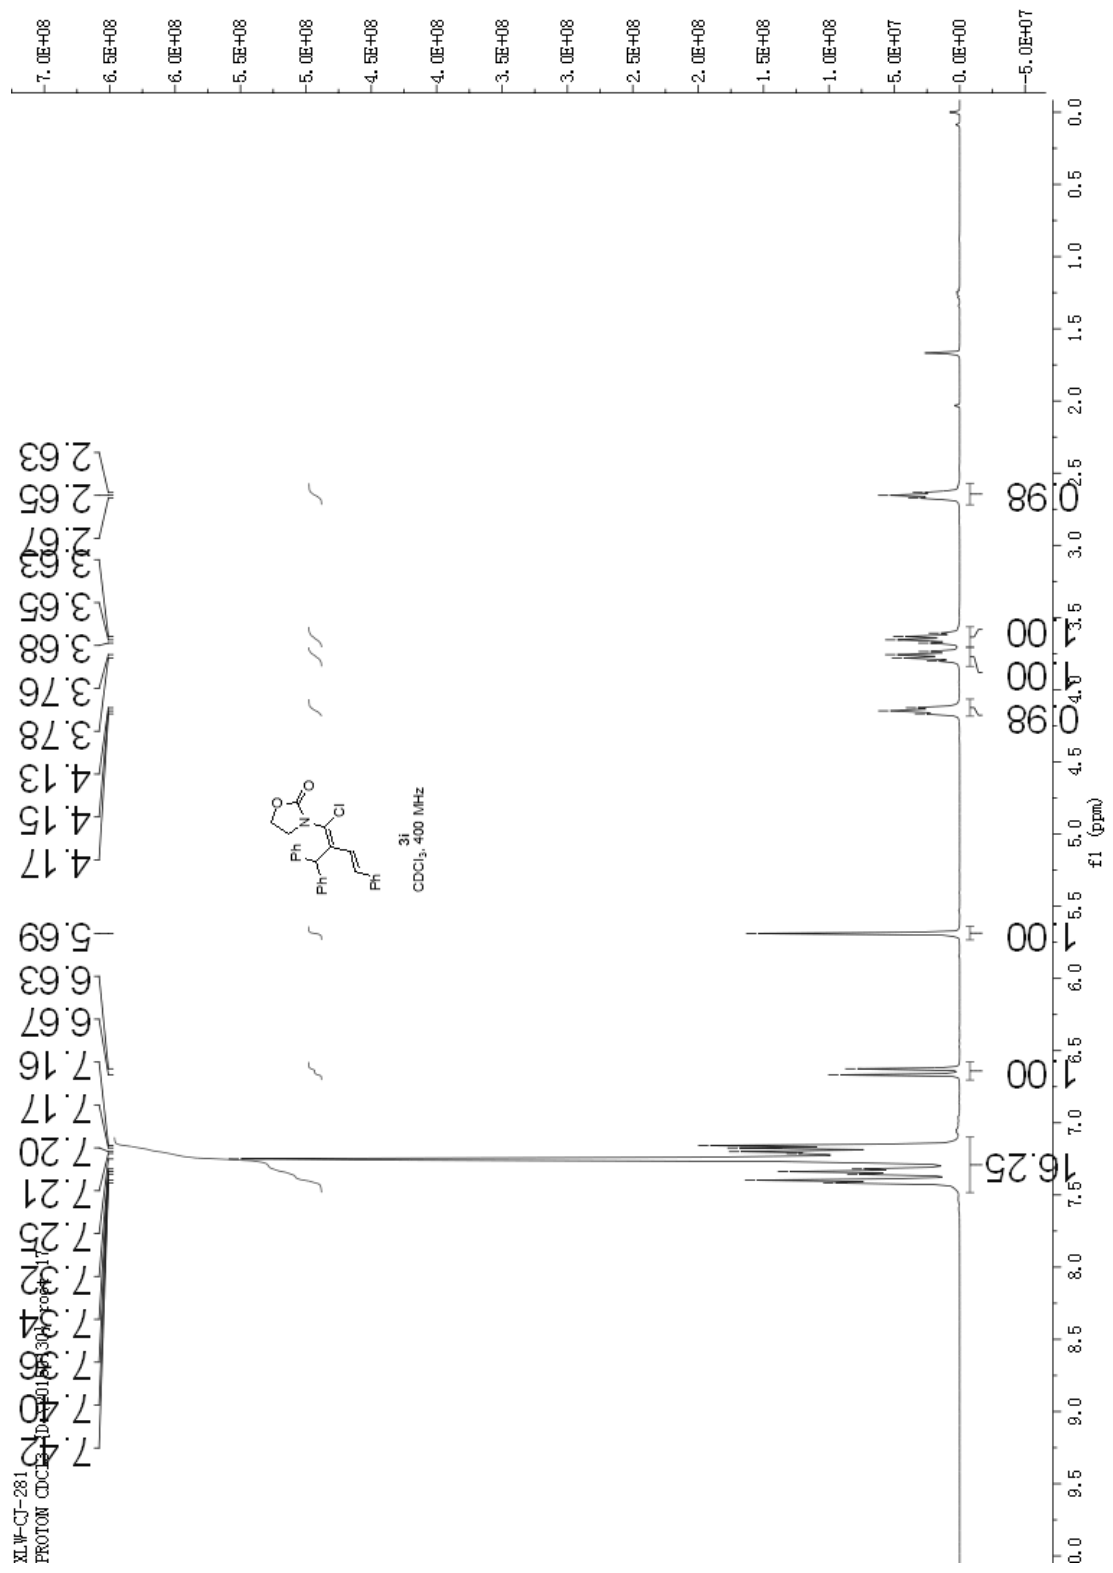

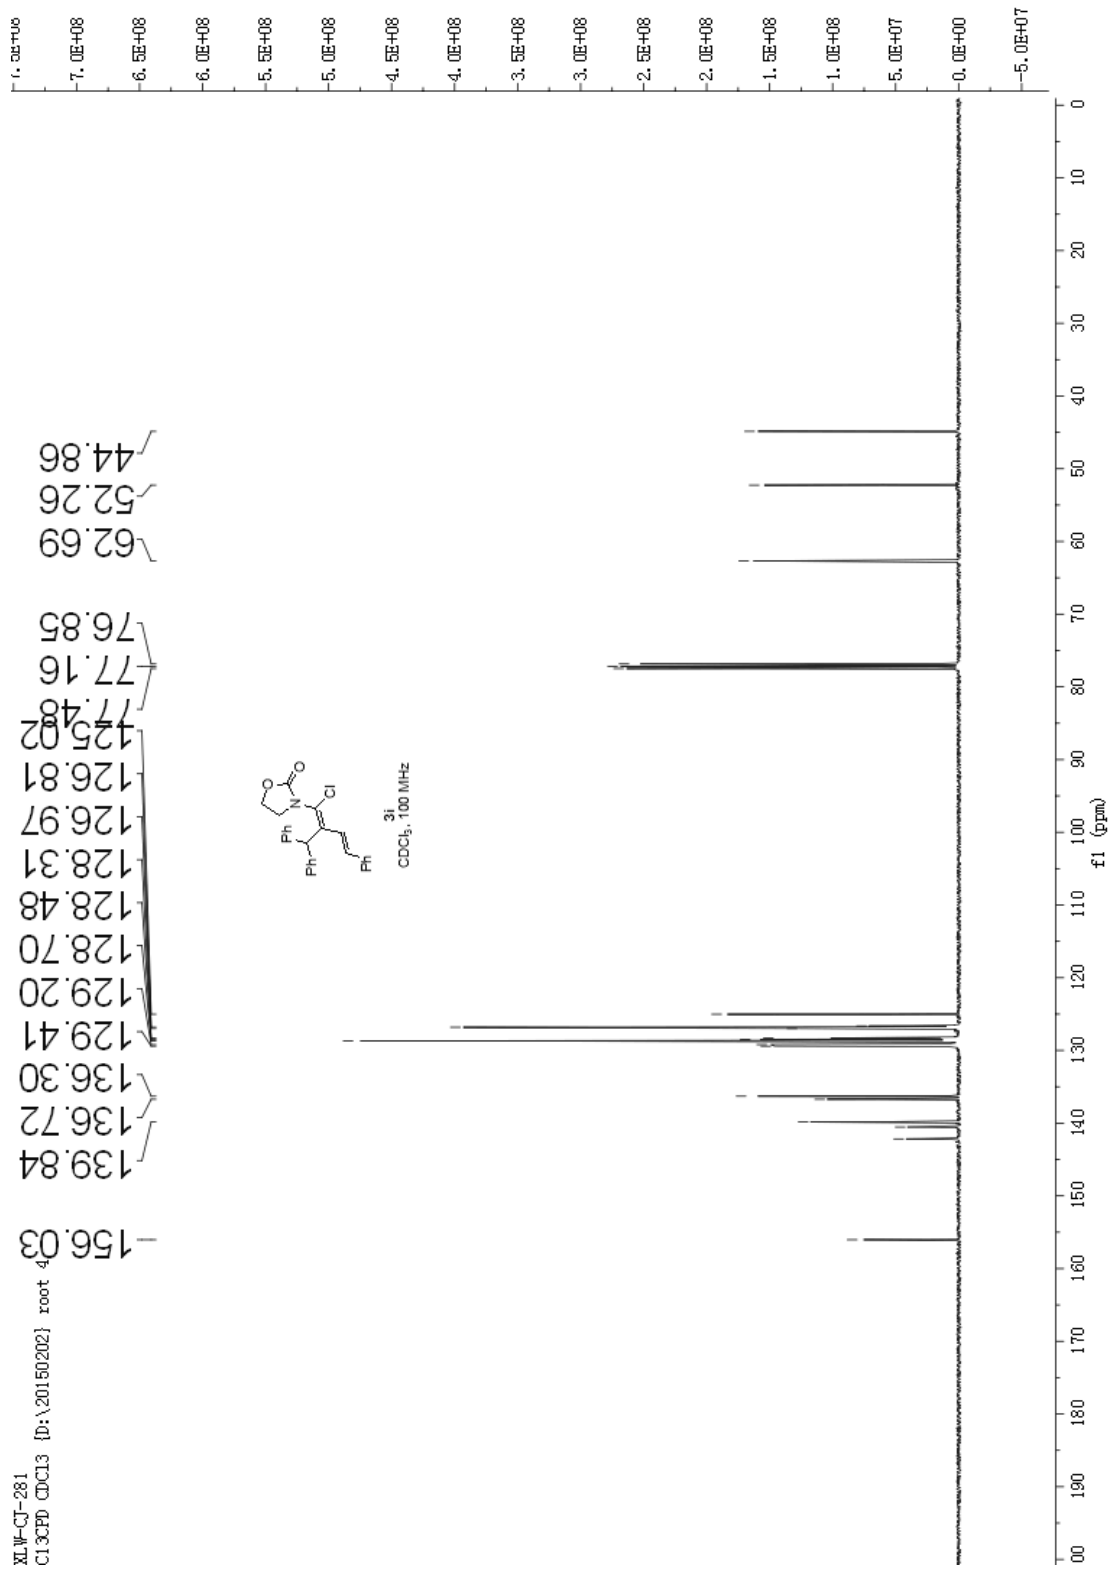

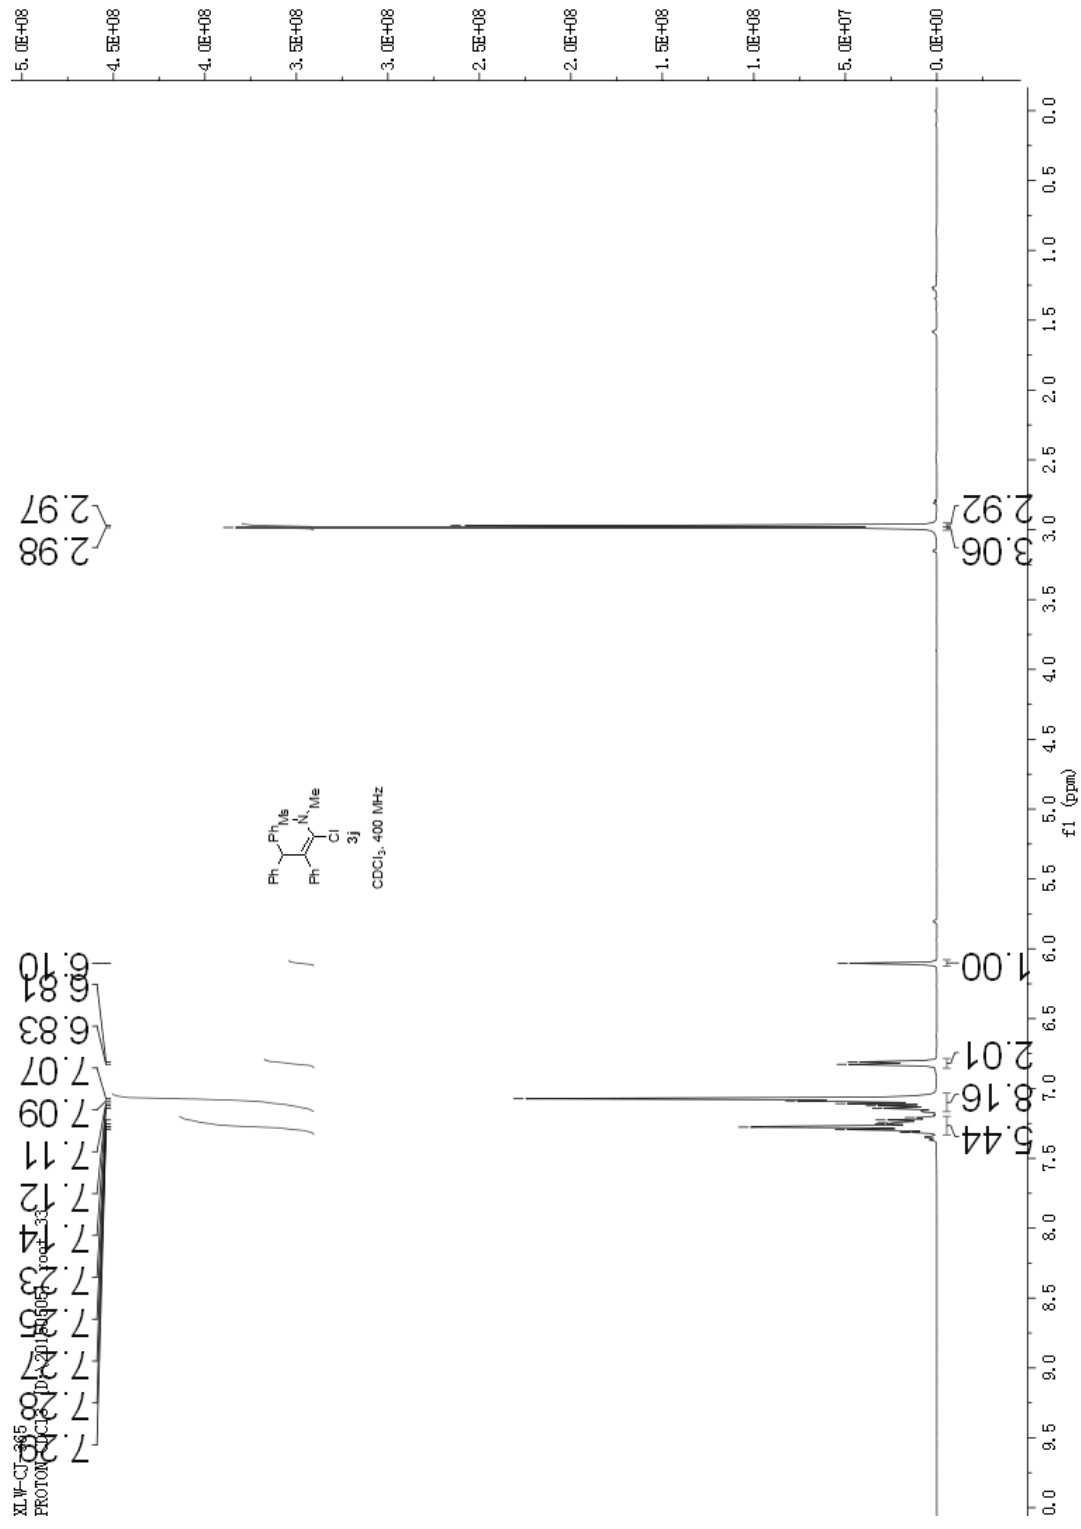

XLW-CJ-185  
 PROTON NMR (CDCl<sub>3</sub>)

x1w-cj-365  
C13CPD CDCl3

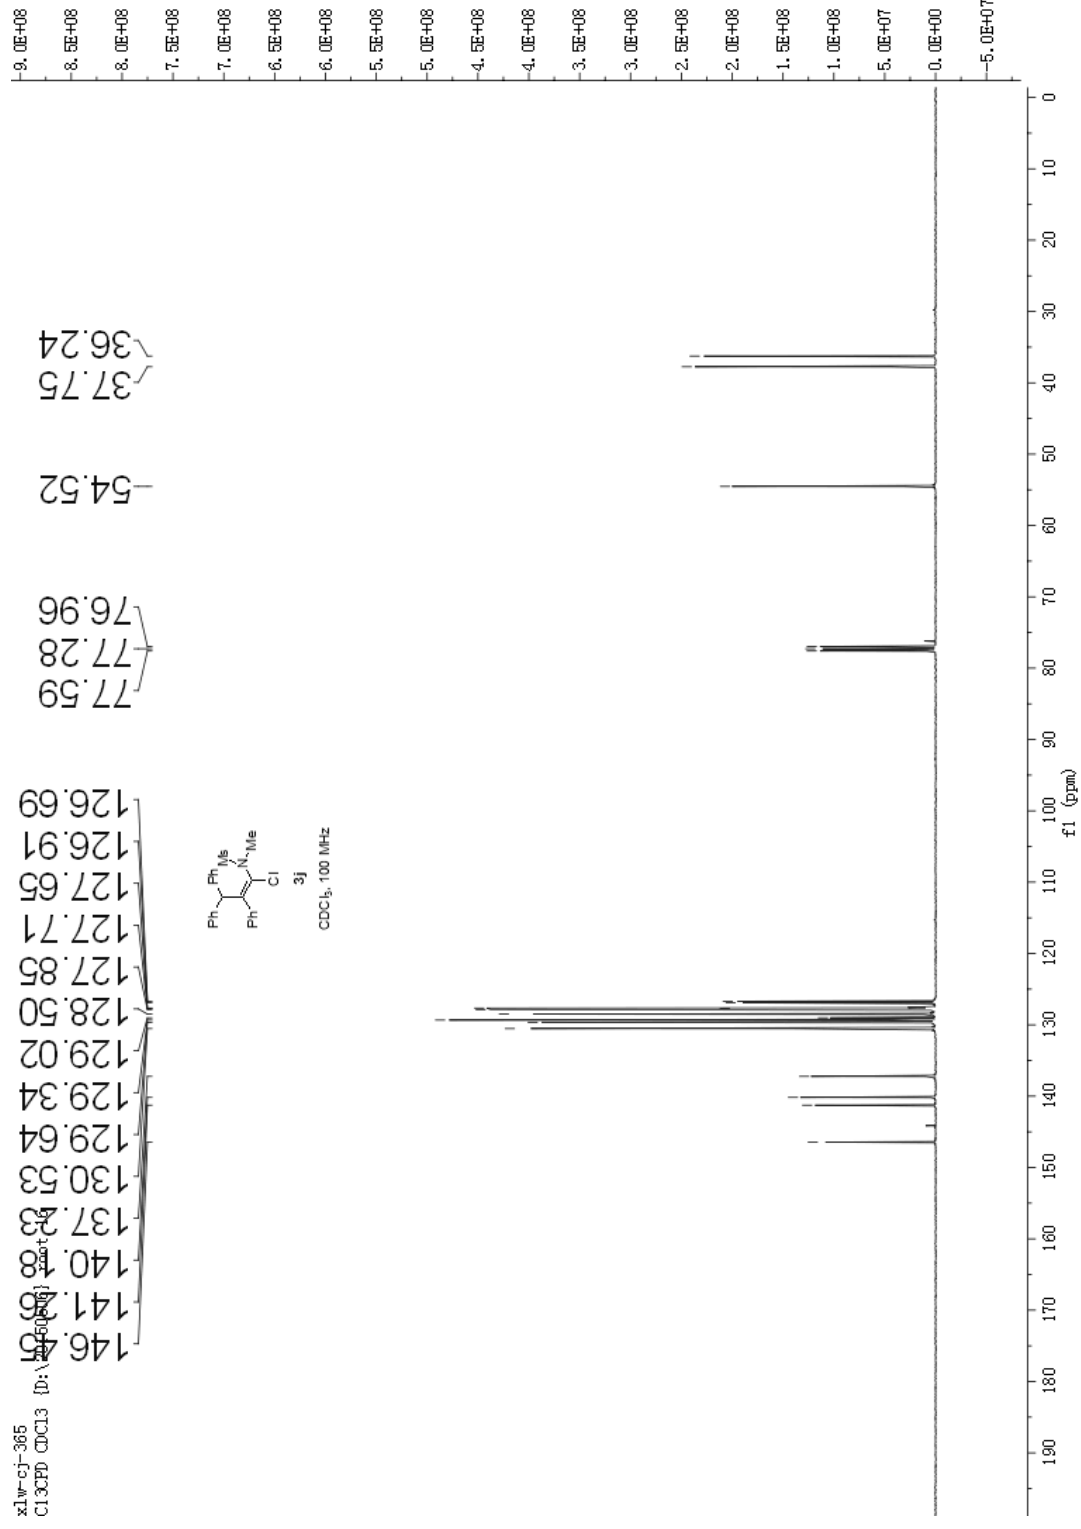

9.0E+08  
8.5E+08  
8.0E+08  
7.5E+08  
7.0E+08  
6.5E+08  
6.0E+08  
5.5E+08  
5.0E+08  
4.5E+08  
4.0E+08  
3.5E+08  
3.0E+08  
2.5E+08  
2.0E+08  
1.5E+08  
1.0E+08  
5.0E+07  
0.0E+00  
-5.0E+07

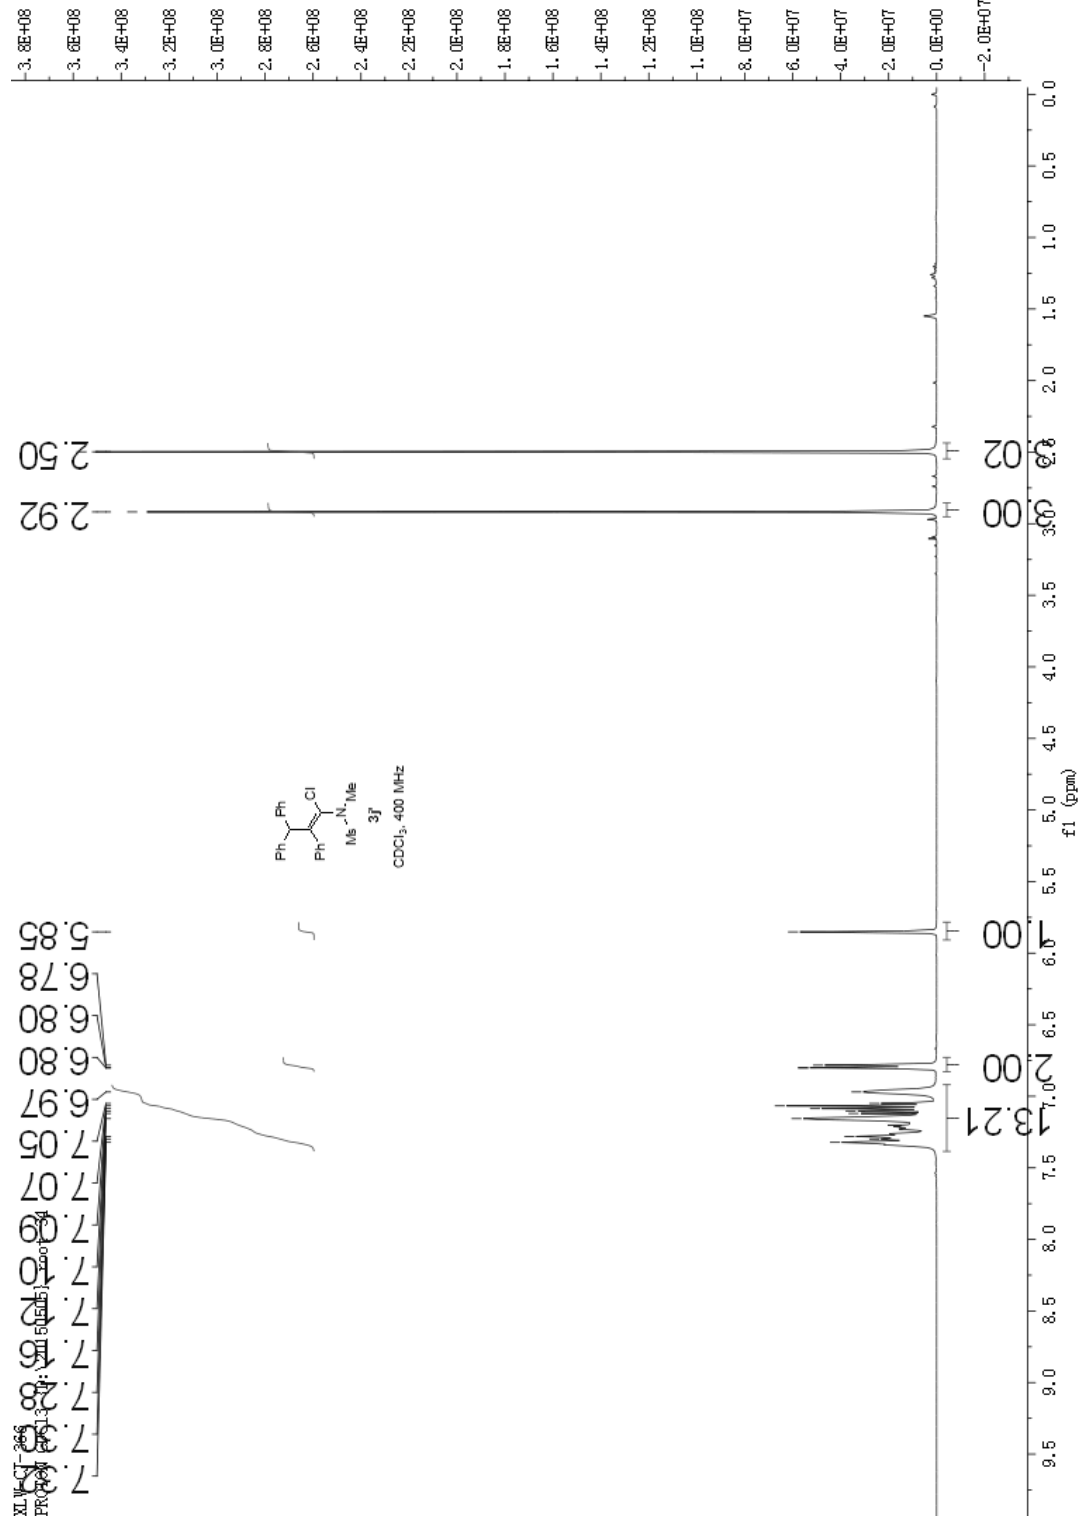

XI W-Cl-266  
 PROTON (400 MHz)

xlw-cj-366  
C13CPD CDCl3 [D: \20150809]

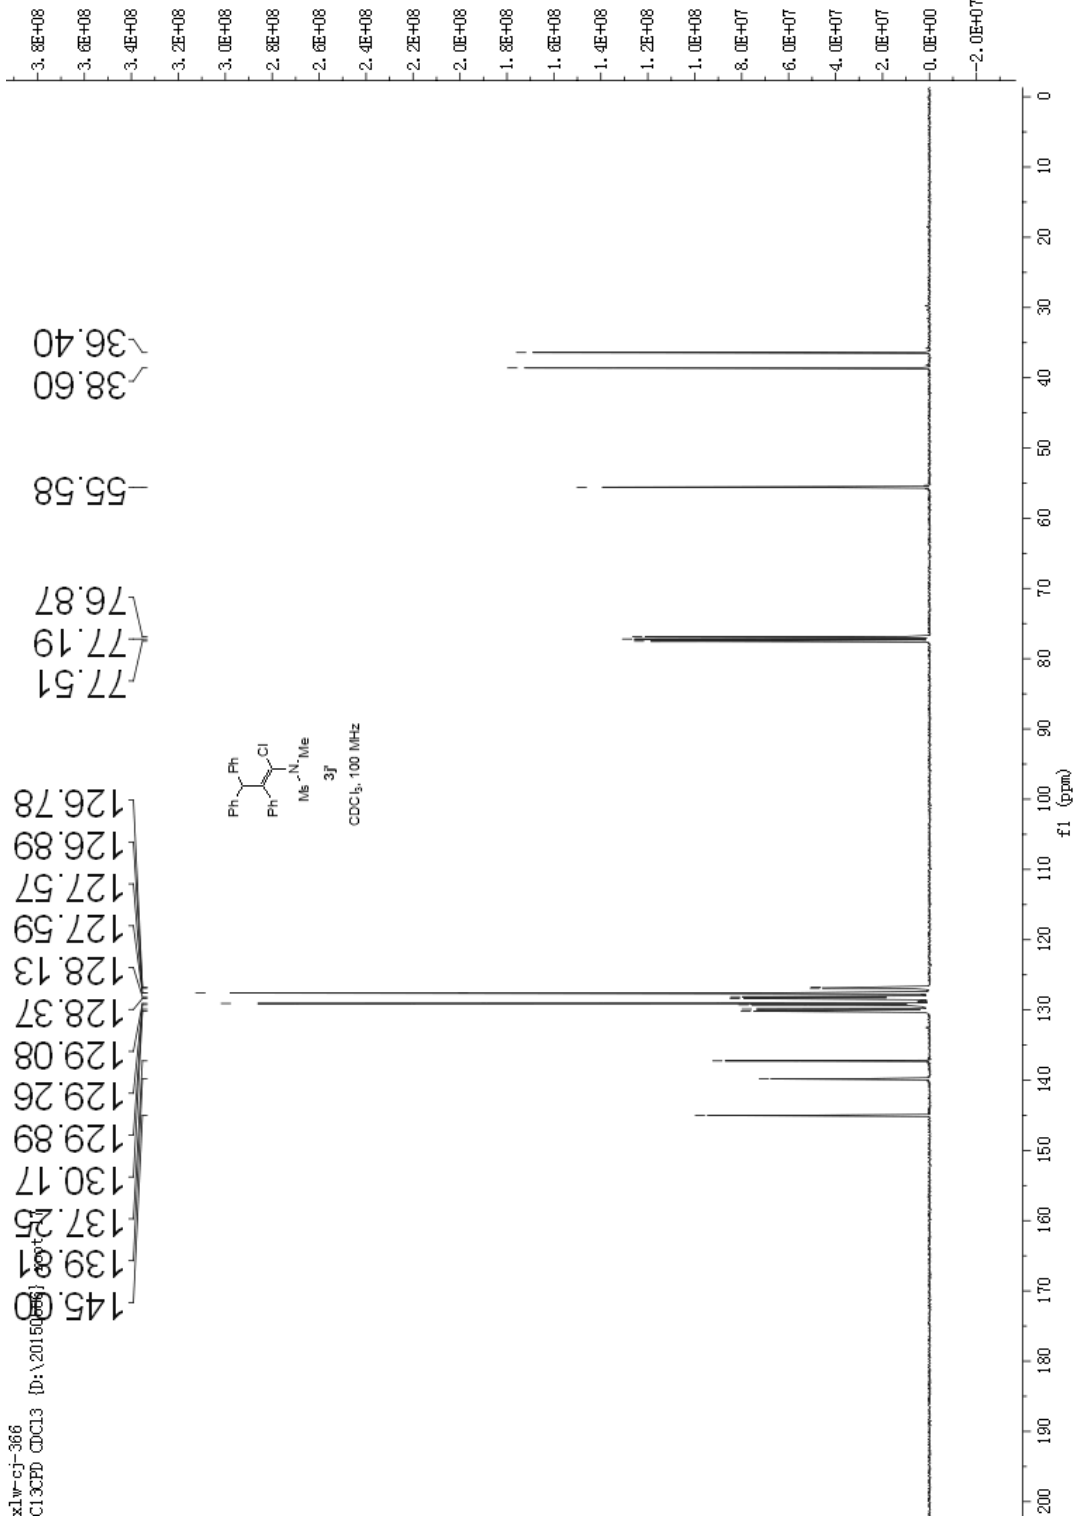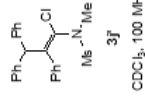

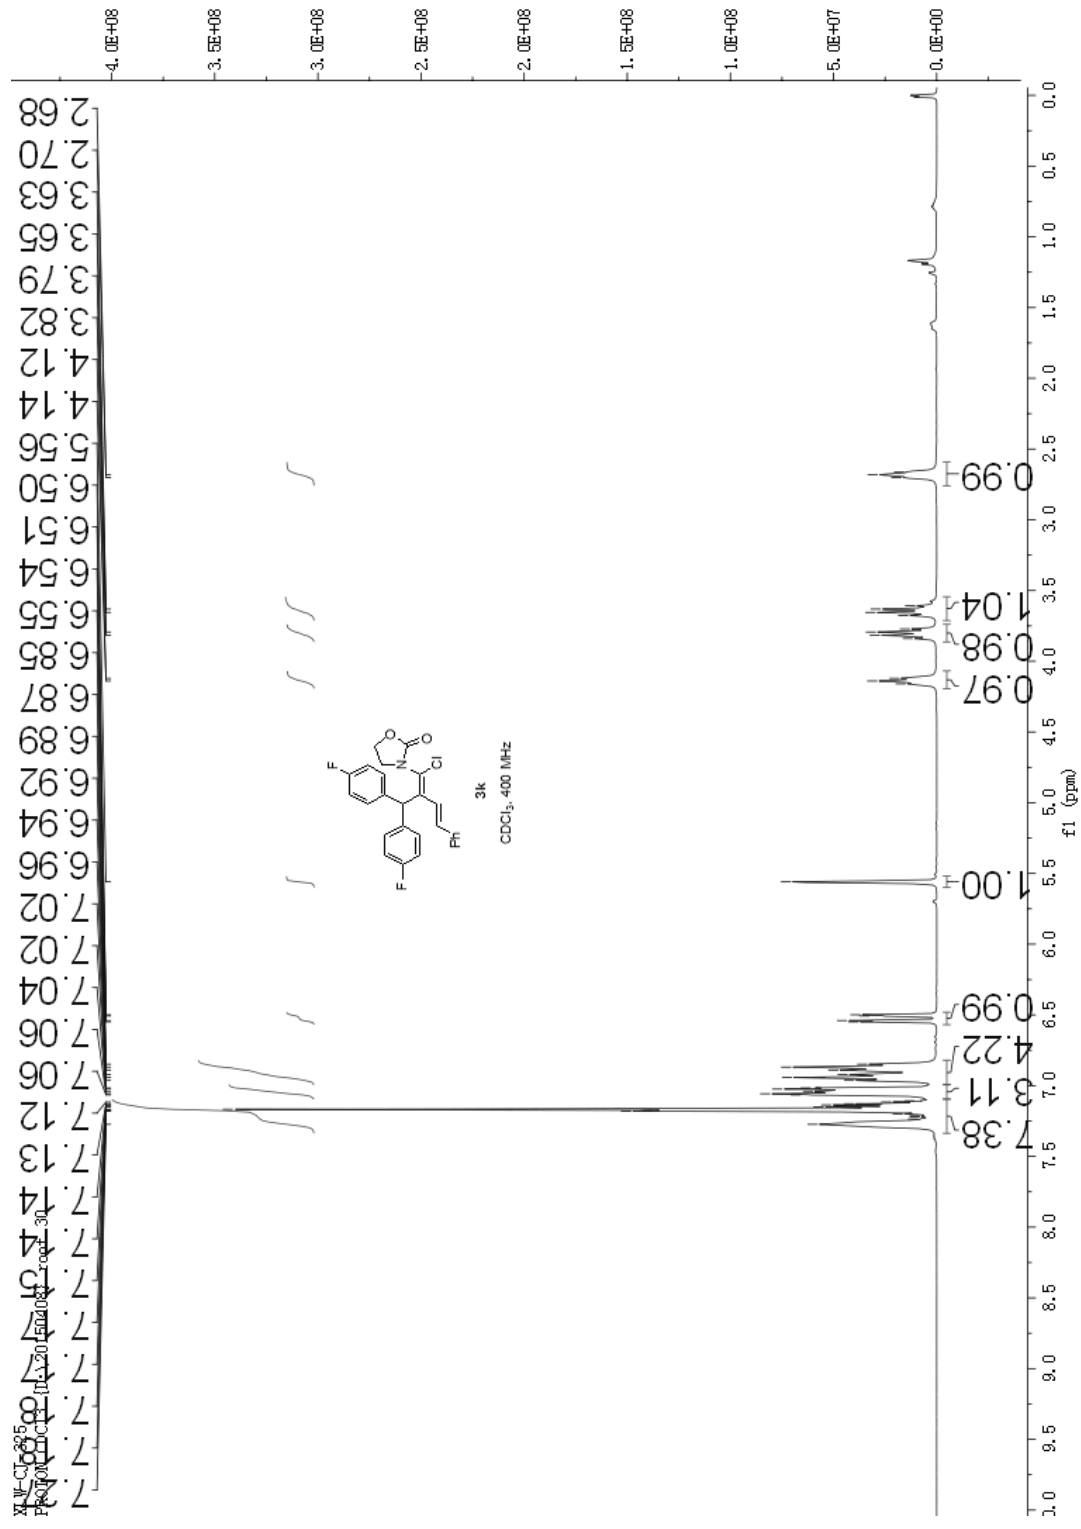



XI.W-CJ-325  
C13CPD CDCl3 (D:\20150410

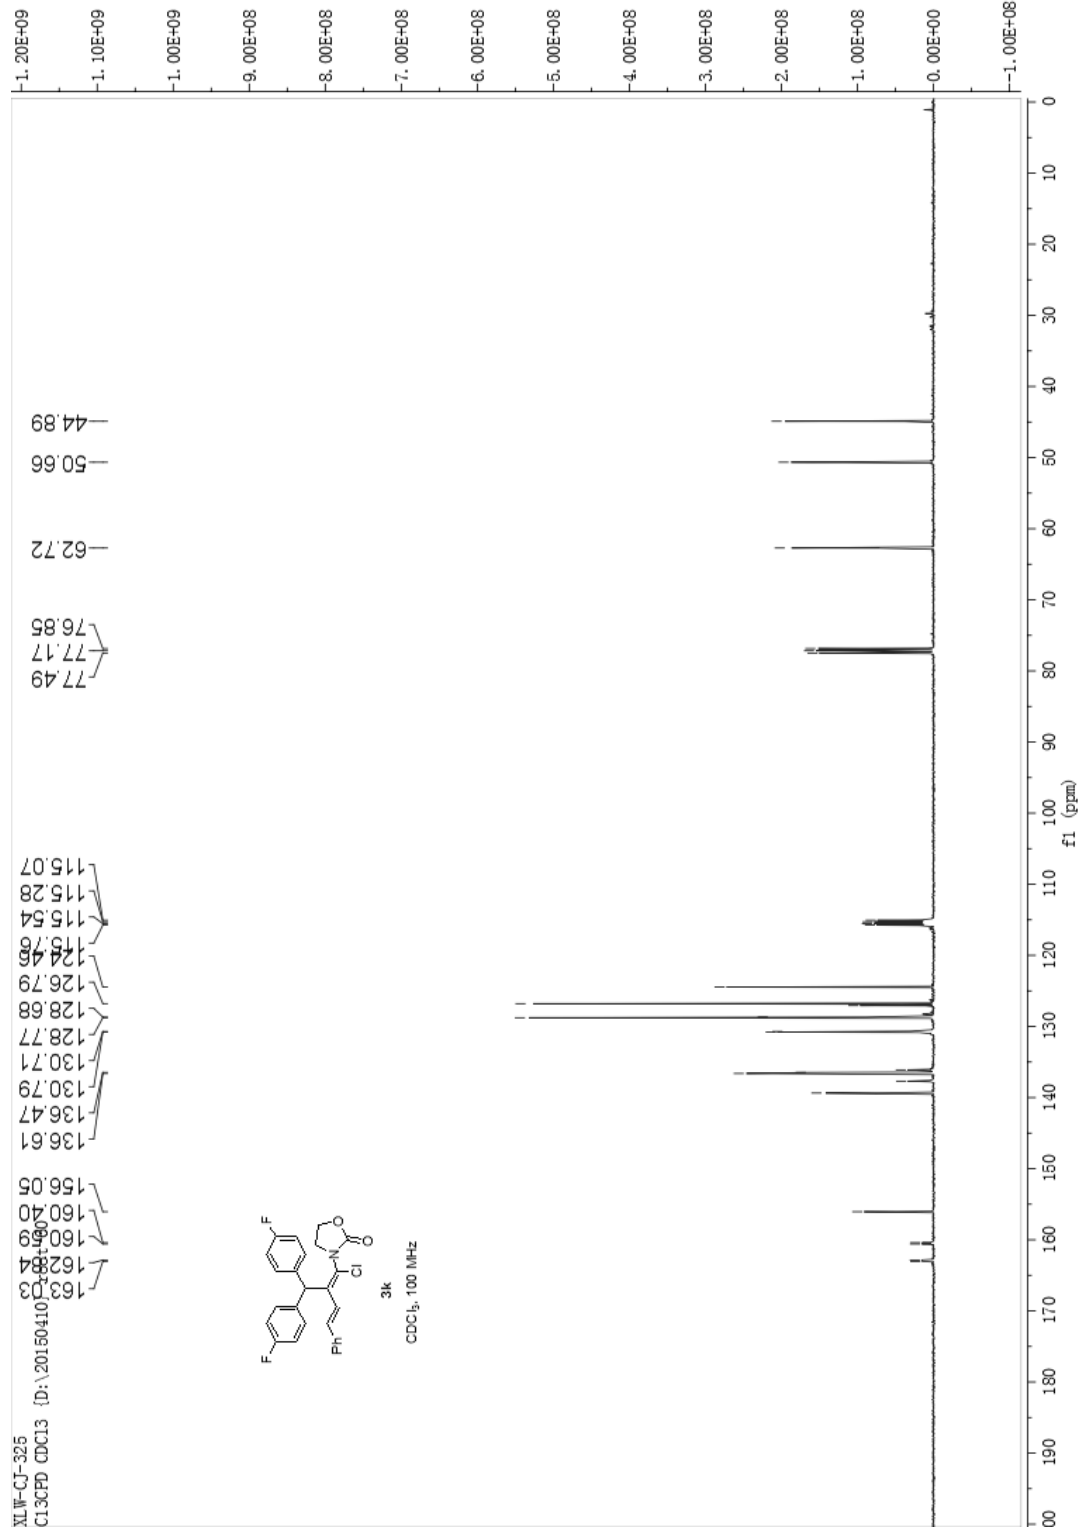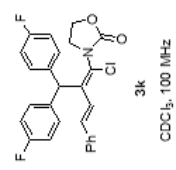



XI.W-CJ-336  
C13CPD CDCl3 (D:\20150415) r8

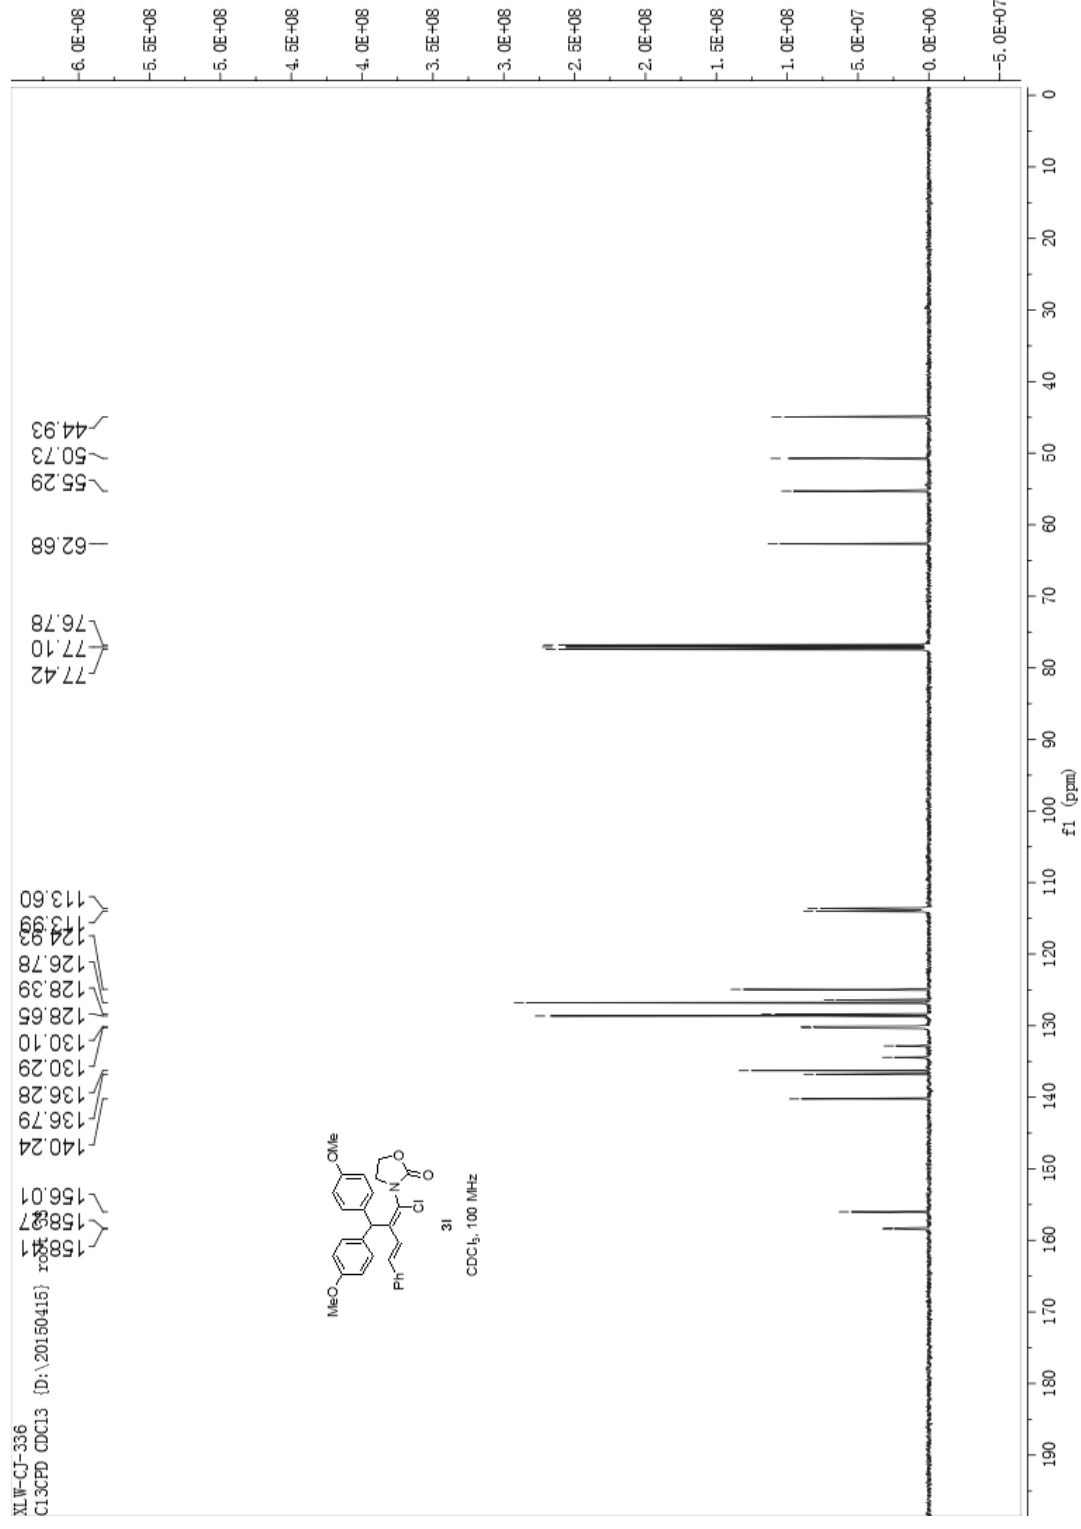

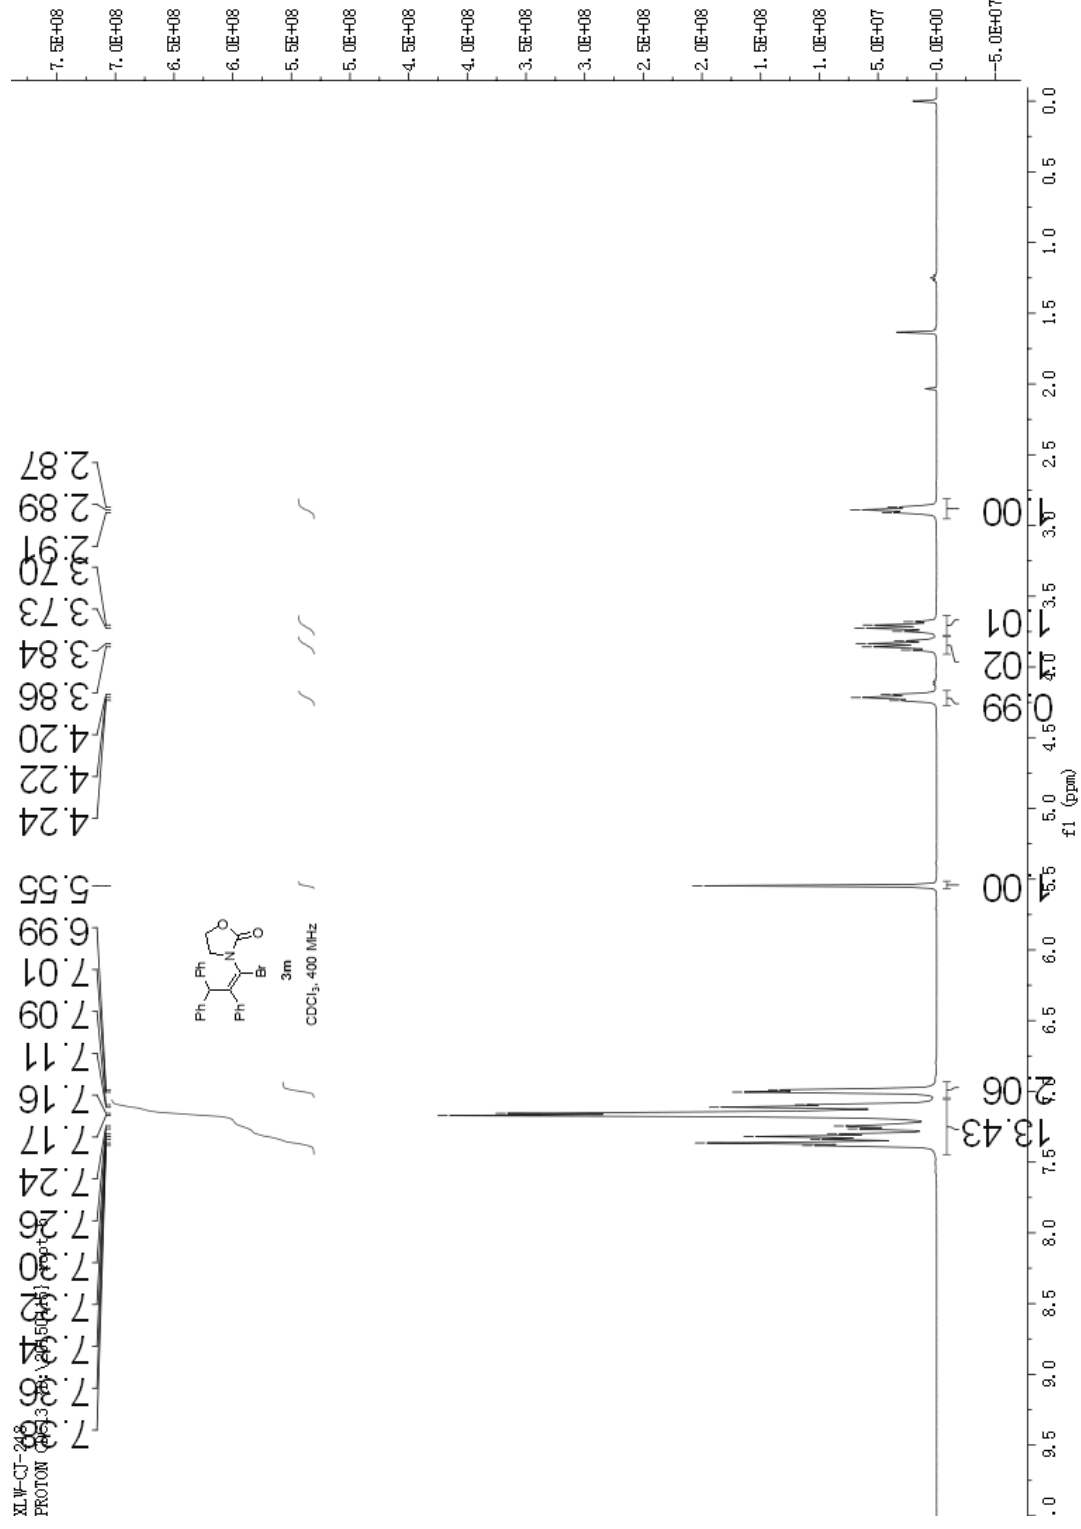

xjw-cj-248  
C13CPD CDCl3

155.74  
148.77  
140.74  
140.70  
140.05  
129.85  
129.34  
129.08  
128.56  
128.08  
127.79  
127.62  
127.03  
126.69  
118.11

77.43  
77.12  
76.80  
62.54  
56.80  
45.27

-7.5E+08

-7.0E+08

-6.5E+08

-6.0E+08

-5.5E+08

-5.0E+08

-4.5E+08

-4.0E+08

-3.5E+08

-3.0E+08

-2.5E+08

-2.0E+08

-1.5E+08

-1.0E+08

-5.0E+07

0.0E+00

-5.0E+07

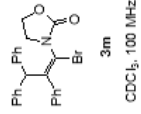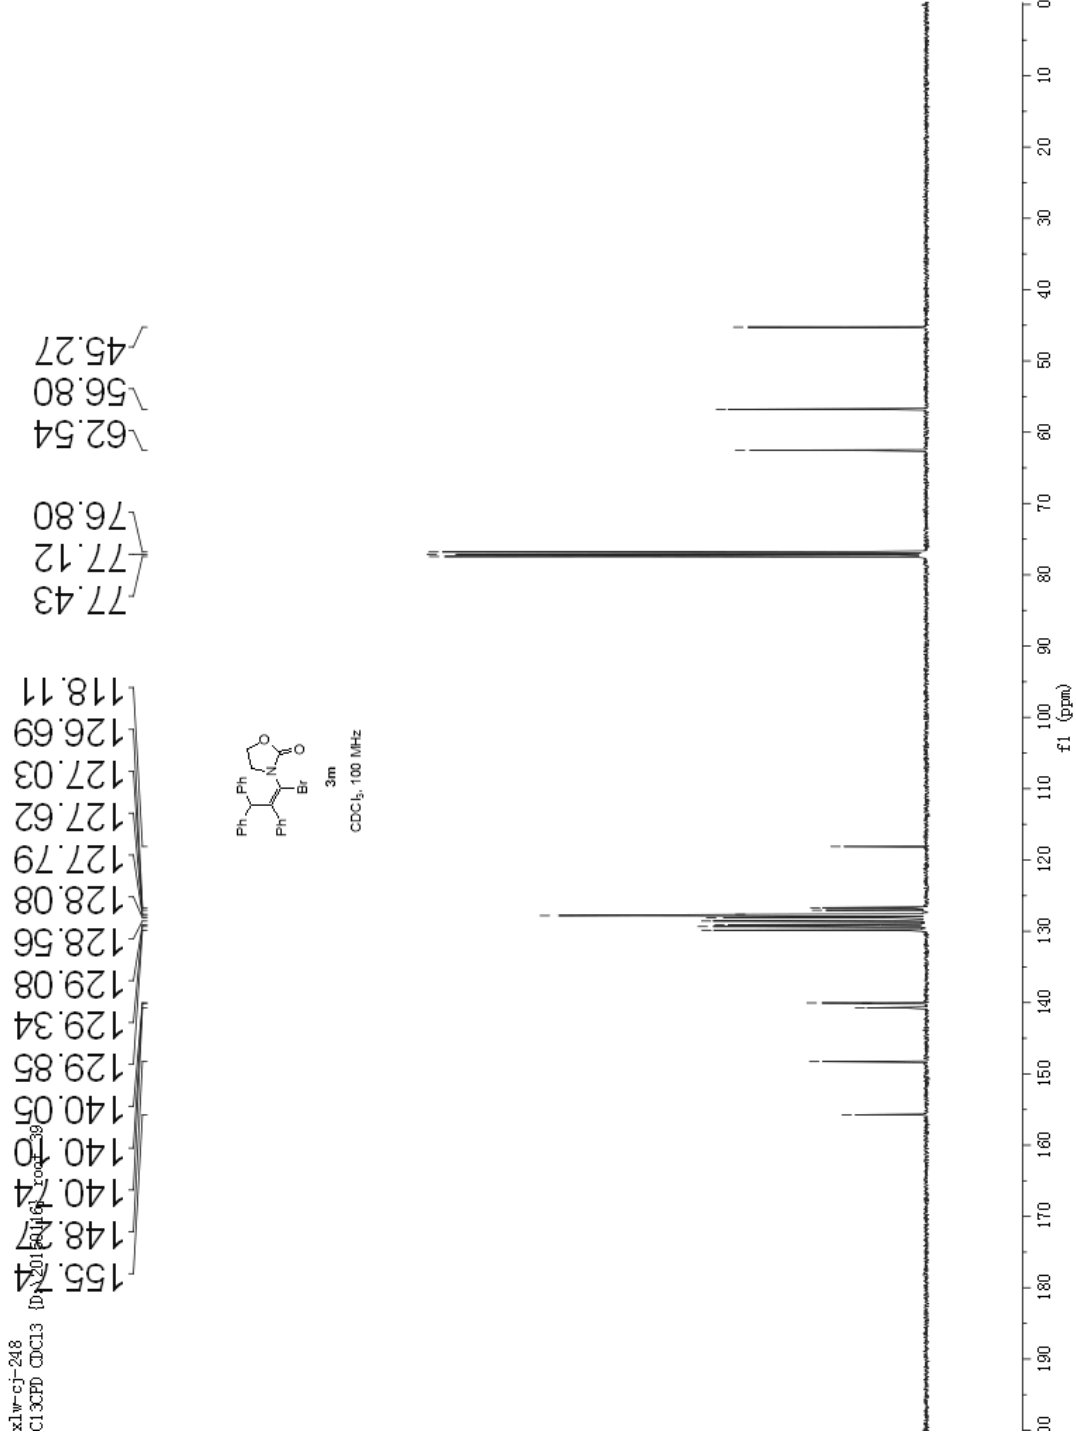

XI.W-CJ-249  
PROTON CDCl3 (D:\20150115) root

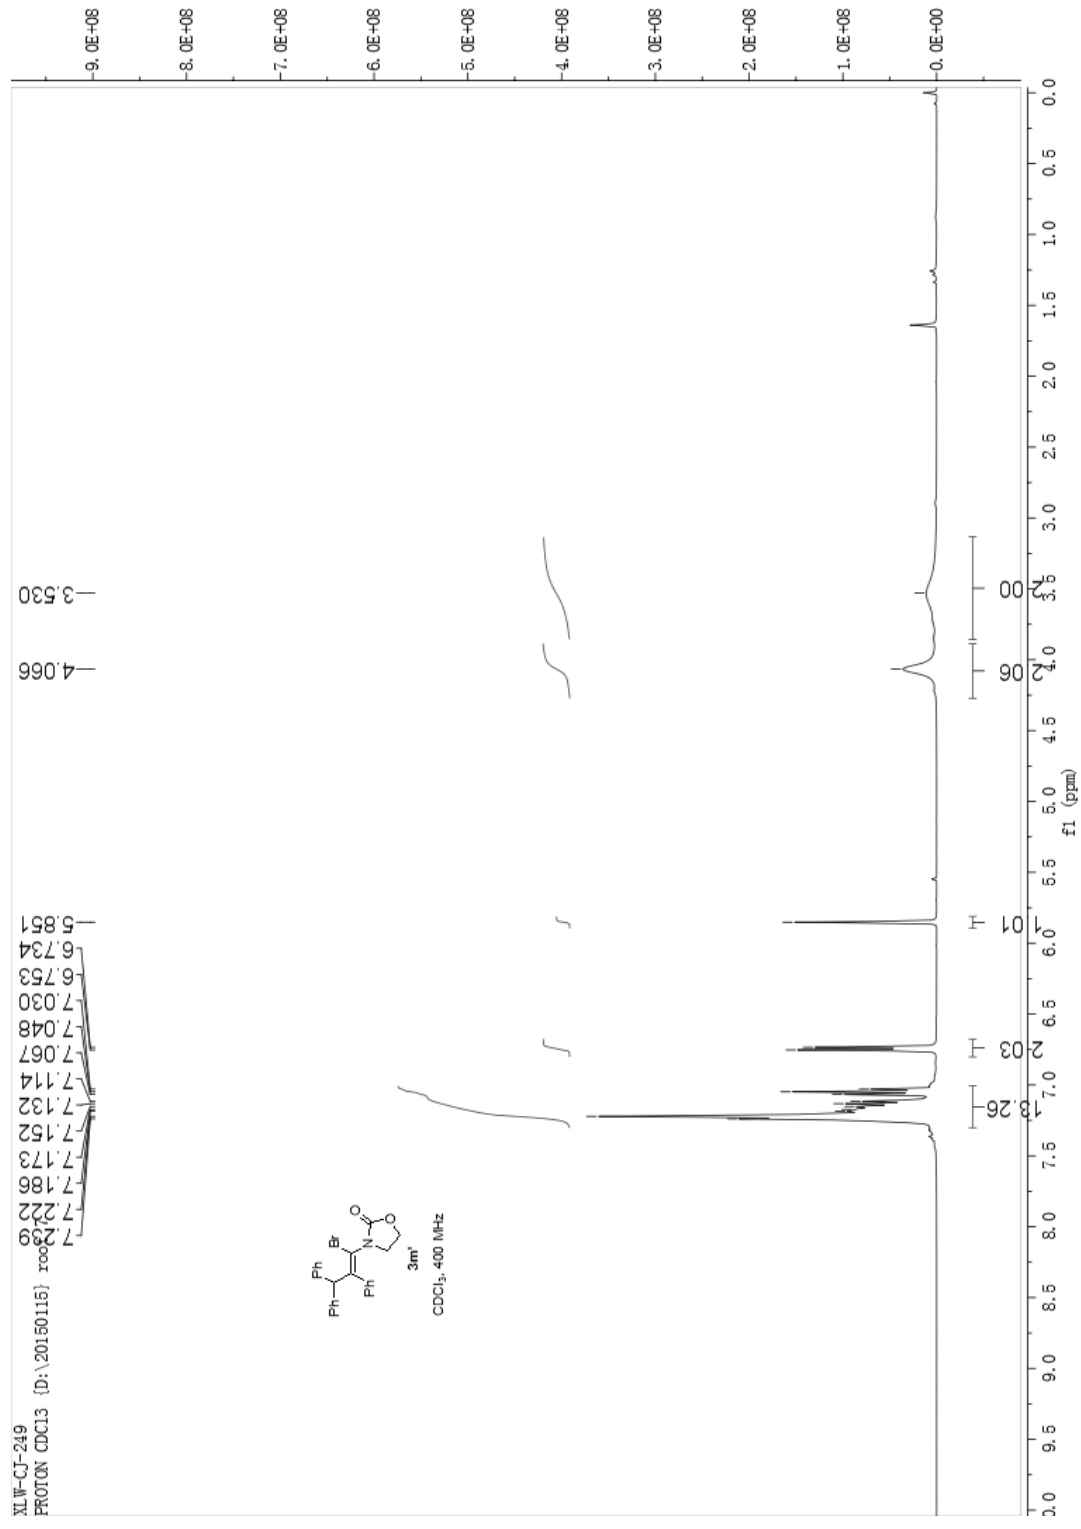

x1w-cj-249  
C13CPD CDCl3 [D:\20150116]

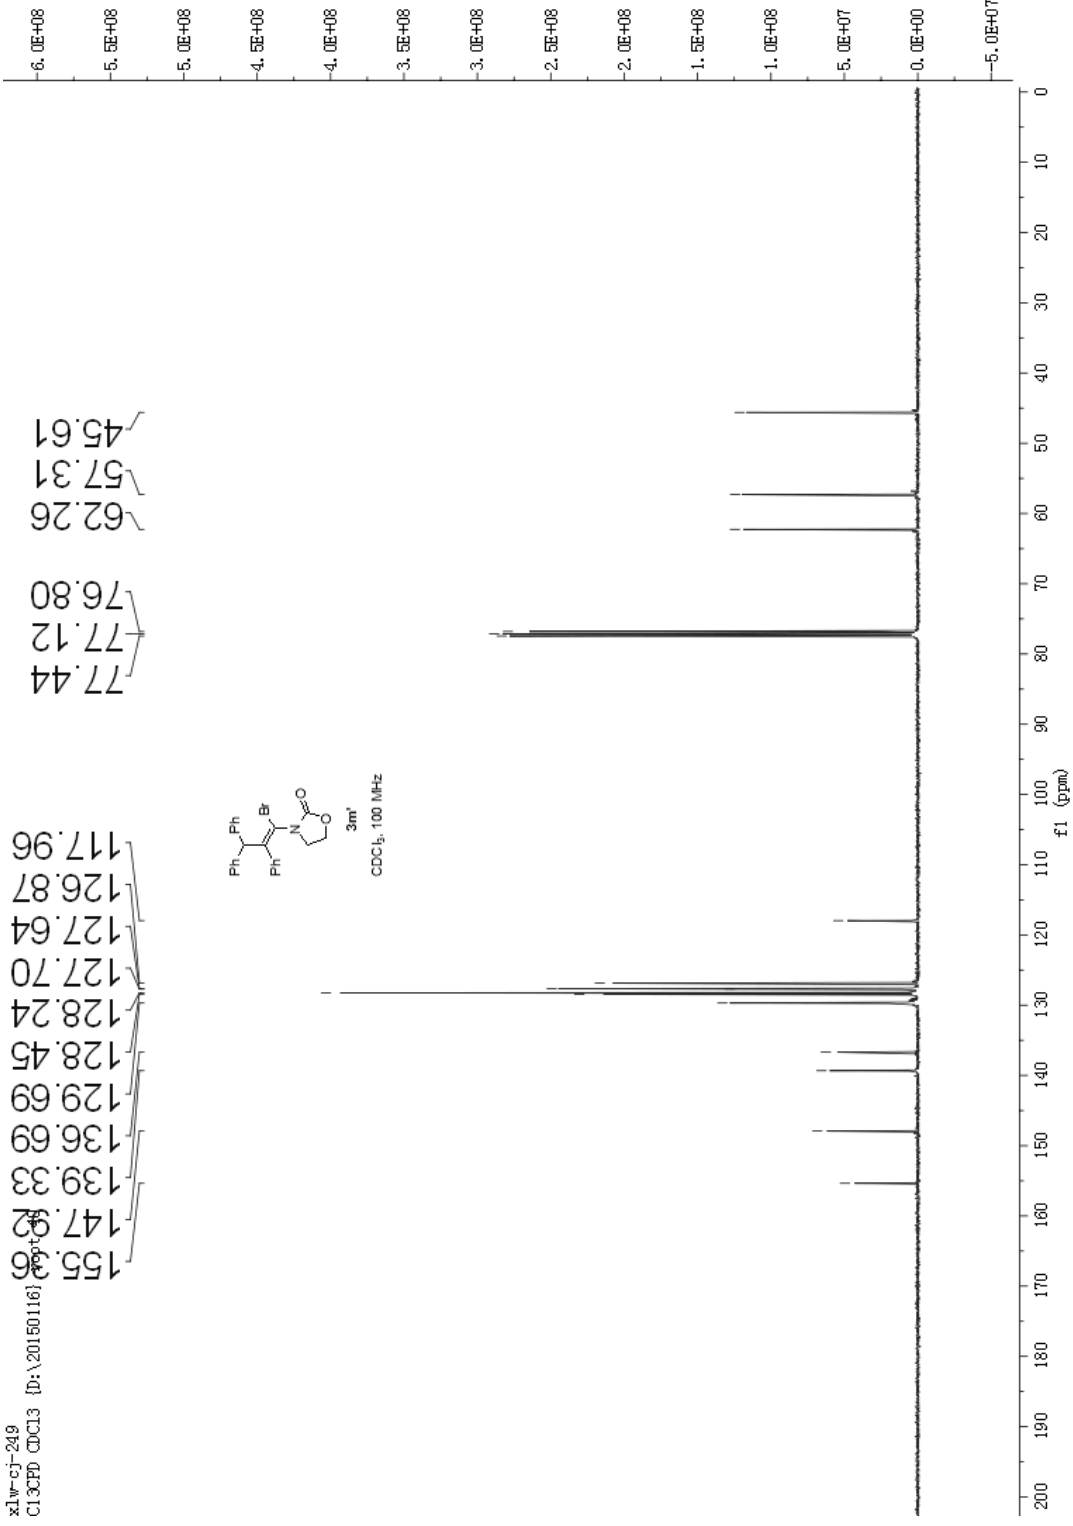

XI.W-CJ-274  
PROTON CDCl3 (D:\20150128) root 15

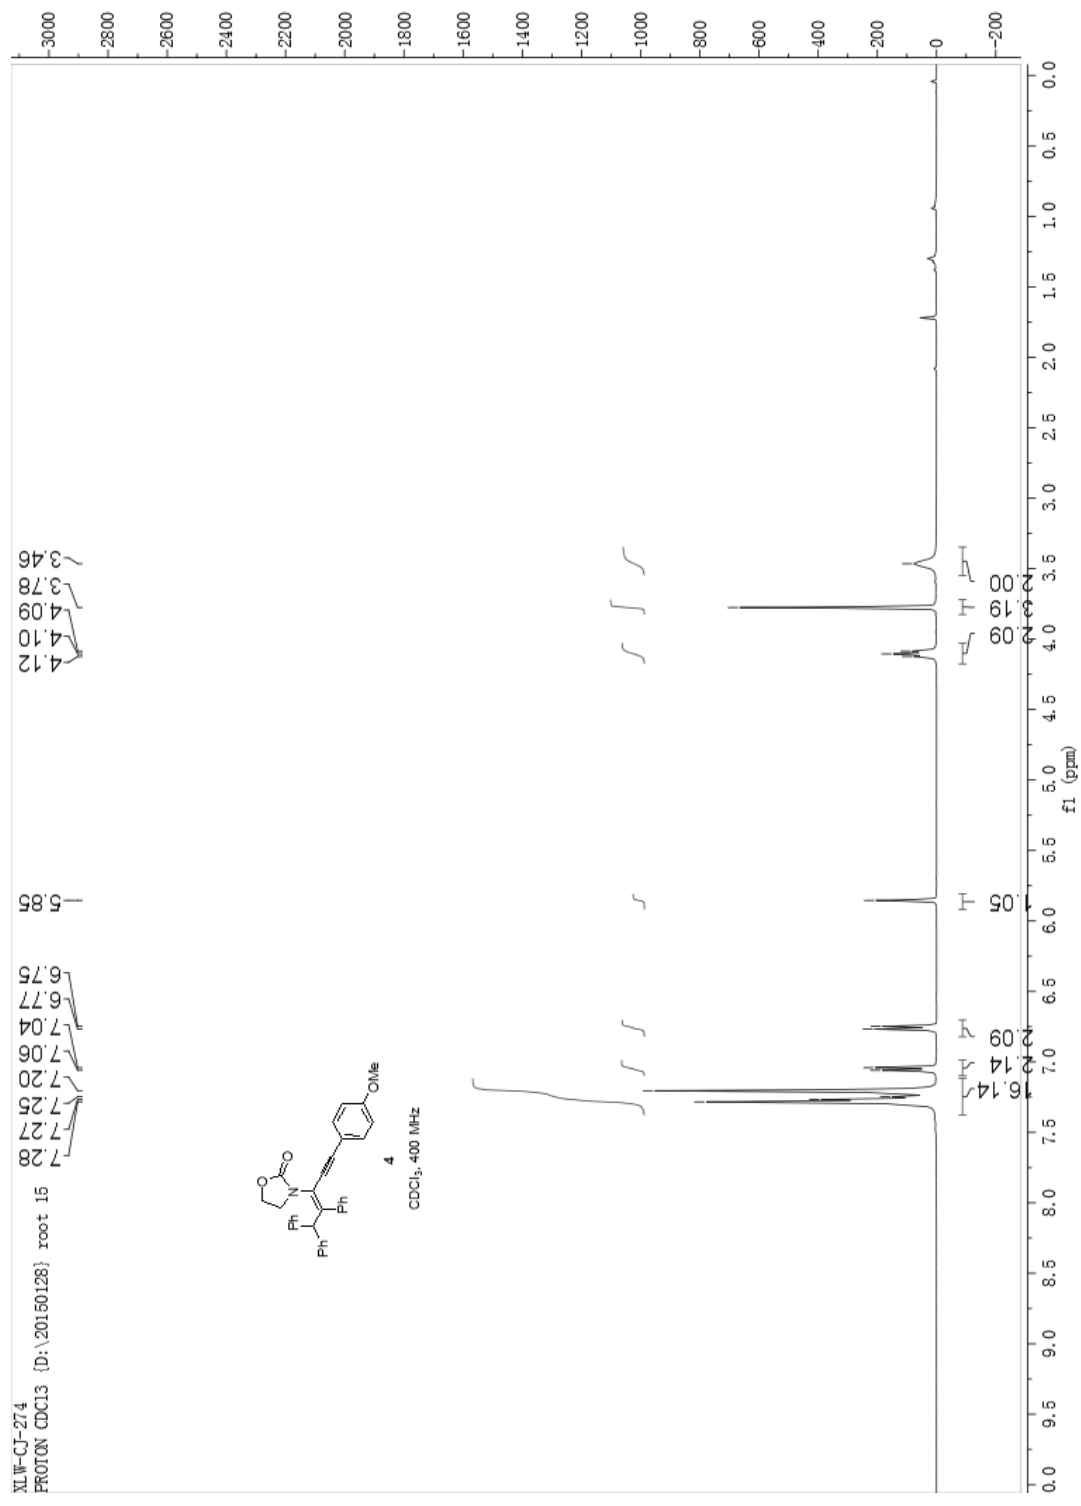



XLW-CJ-274  
C13CPD CDC13 (D:\20150130) root

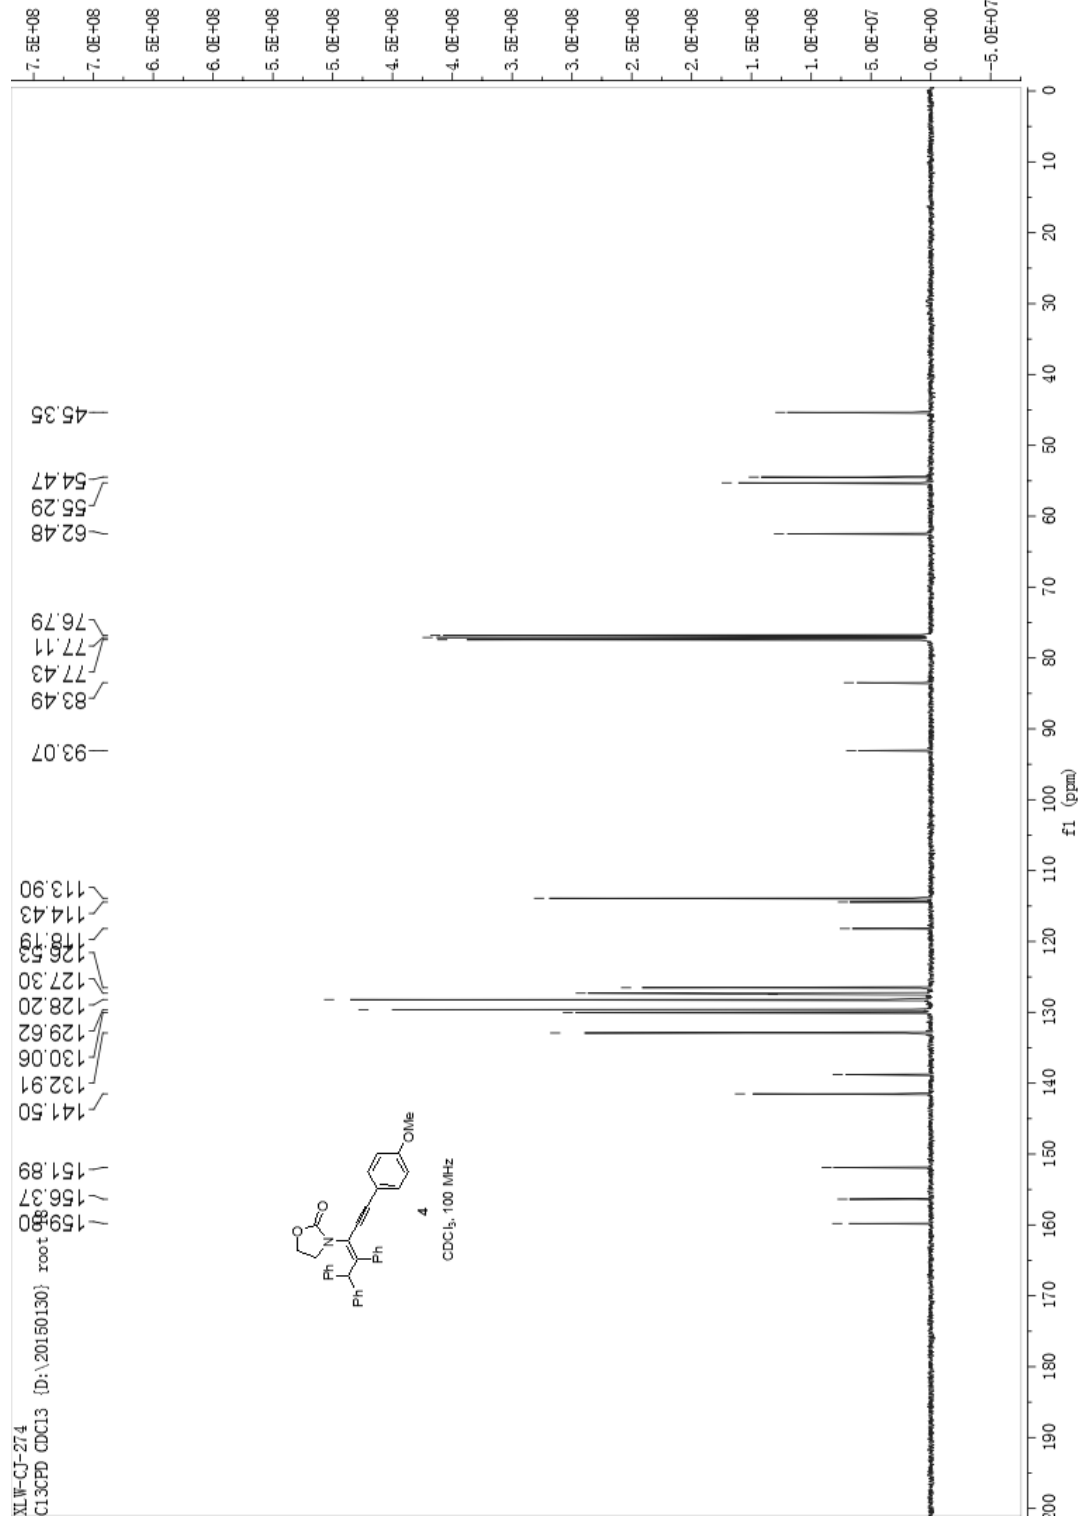

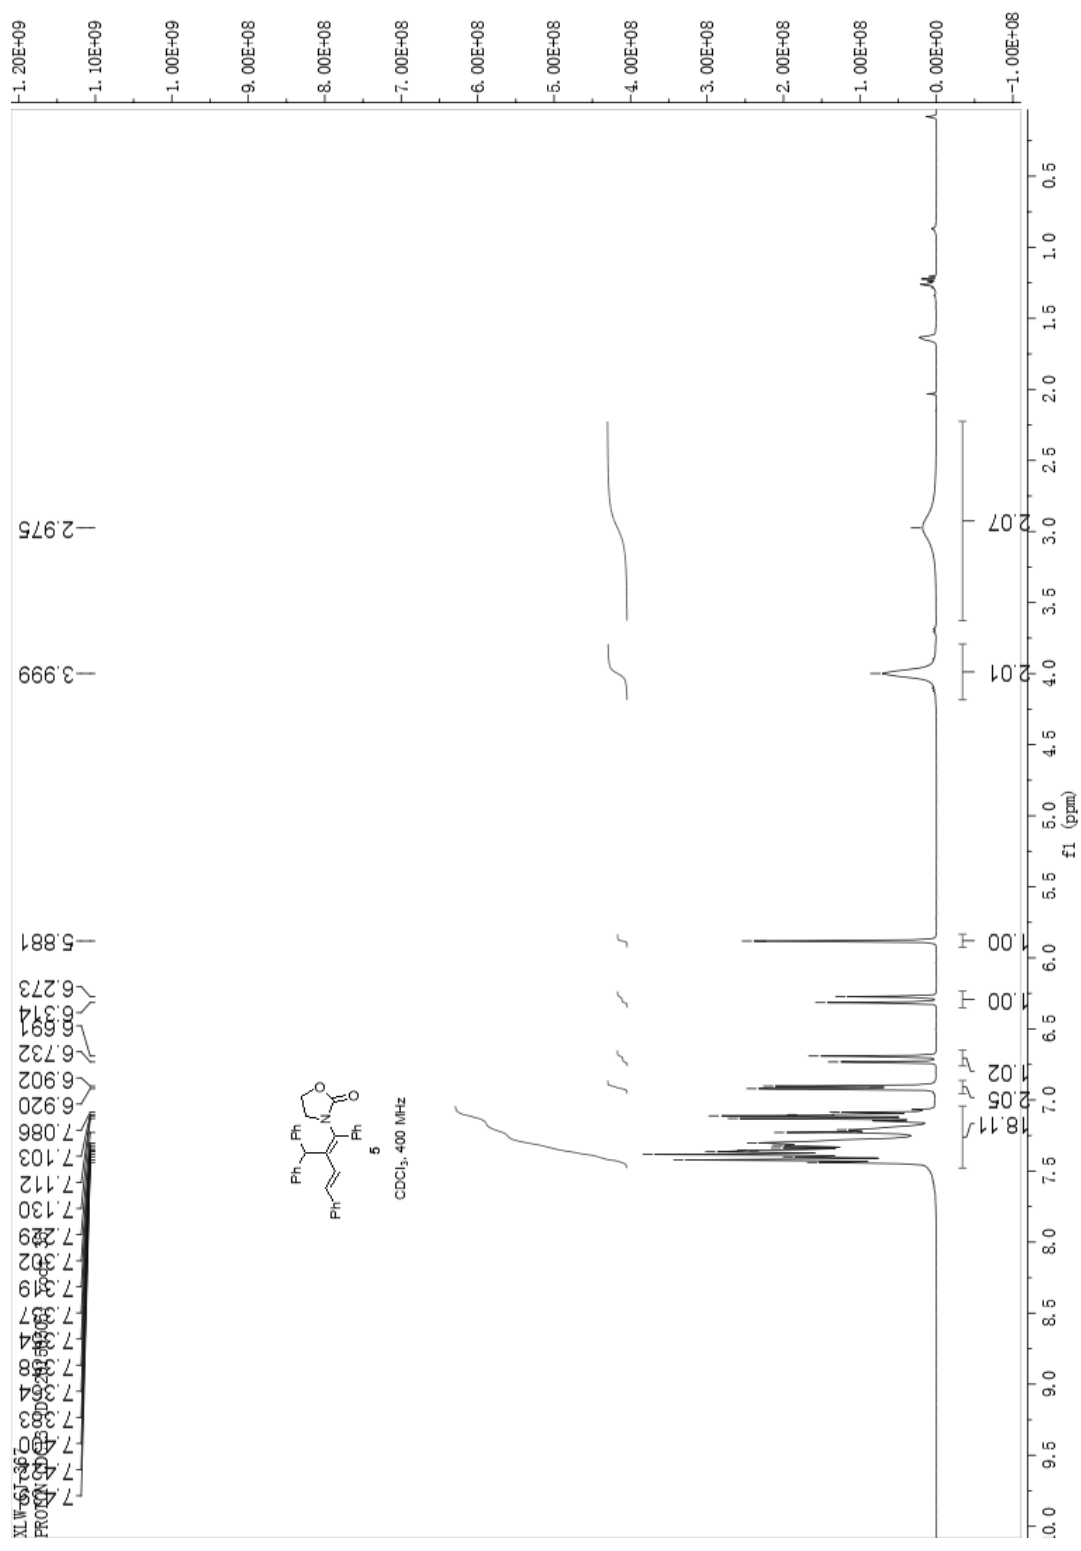

XI.W-CJ-3671  
C13CPD CDCl3 [D:\20150511] root

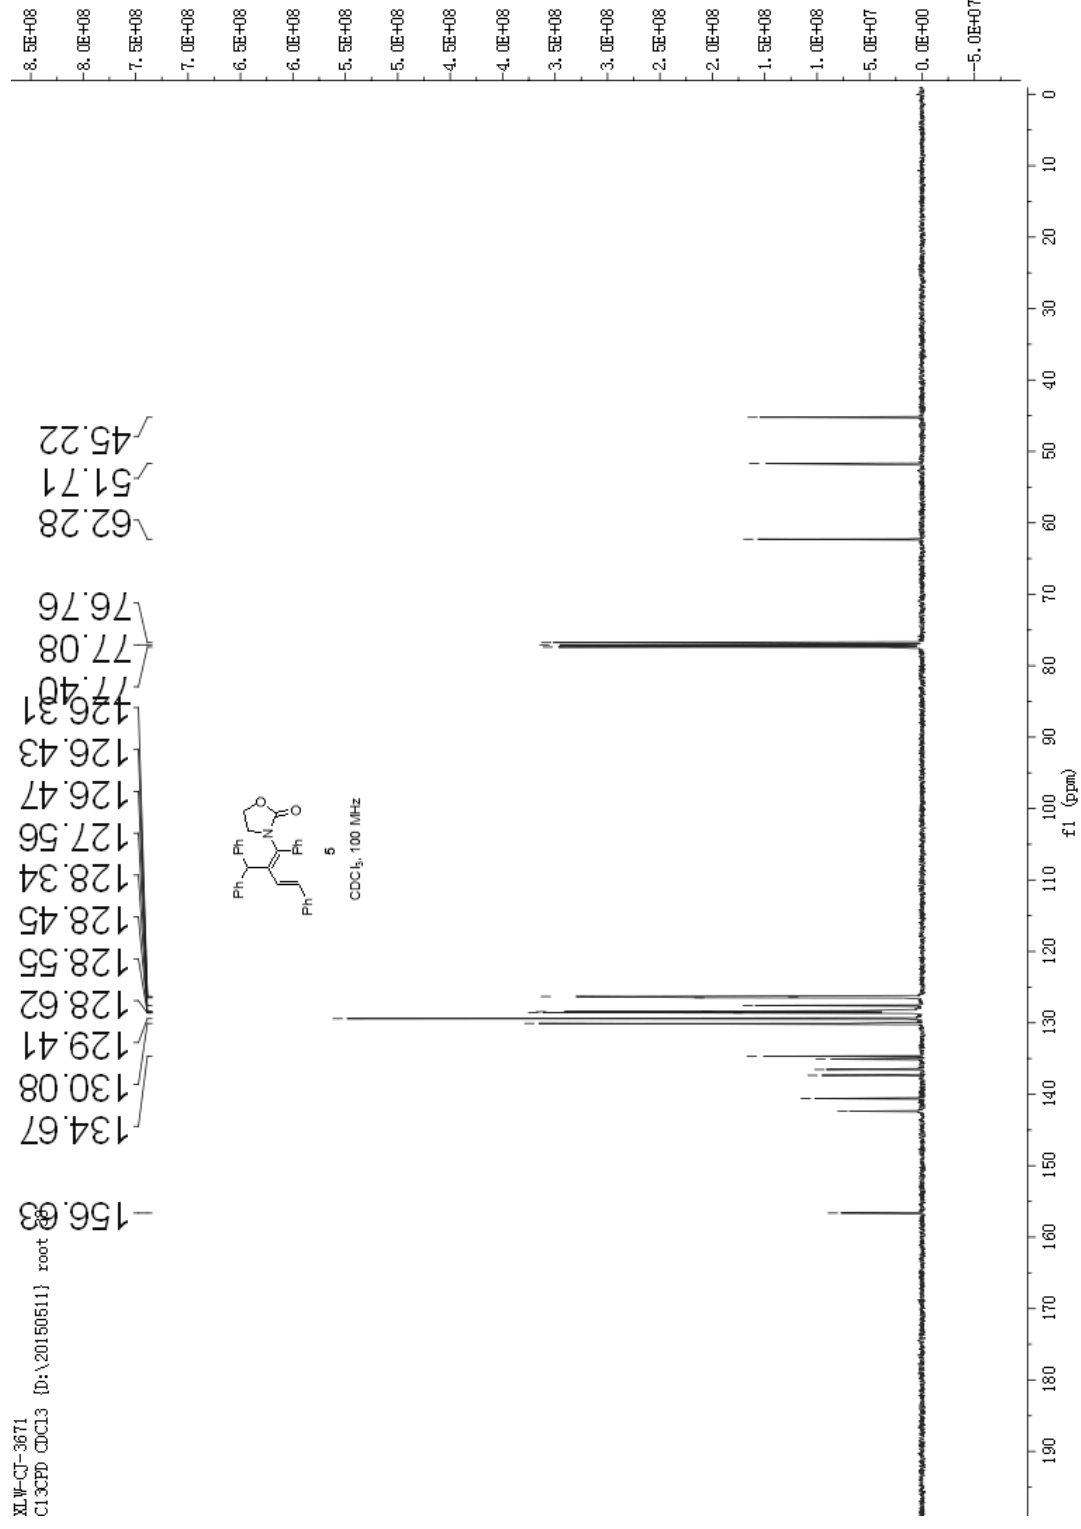

### Crystal Structure of **3a**.

This crystal was deposited in the Cambridge Crystallographic Data Centre and assigned as CCDC 1414495. Further information can be found in the CIF file.

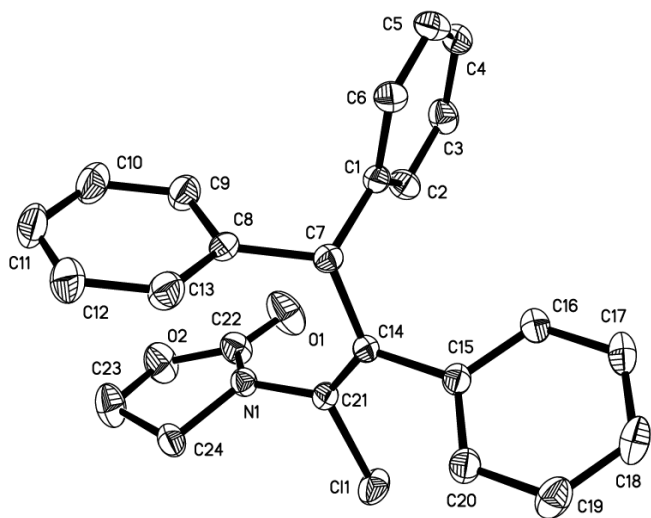

### Crystal Structure of **3j'**.

This crystal was deposited in the Cambridge Crystallographic Data Centre and assigned as CCDC 1414497. Further information can be found in the CIF file.

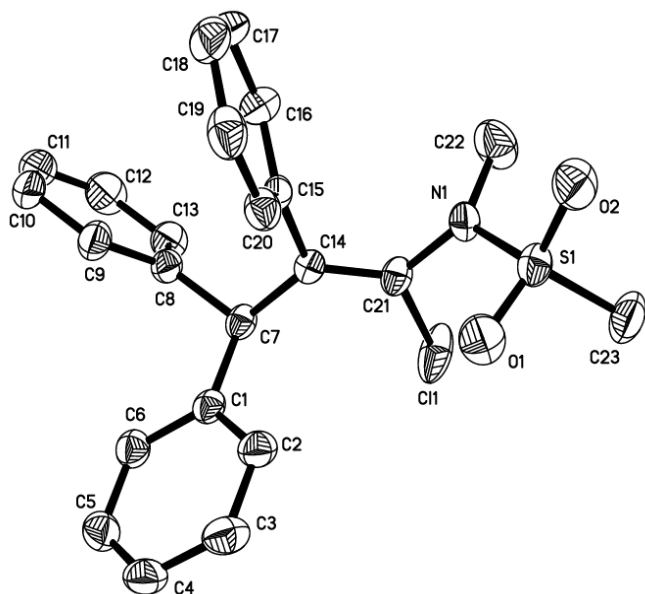

### Crystal Structure of **3m**.

This crystal was deposited in the Cambridge Crystallographic Data Centre and assigned as CCDC 1414496. Further information can be found in the CIF file.

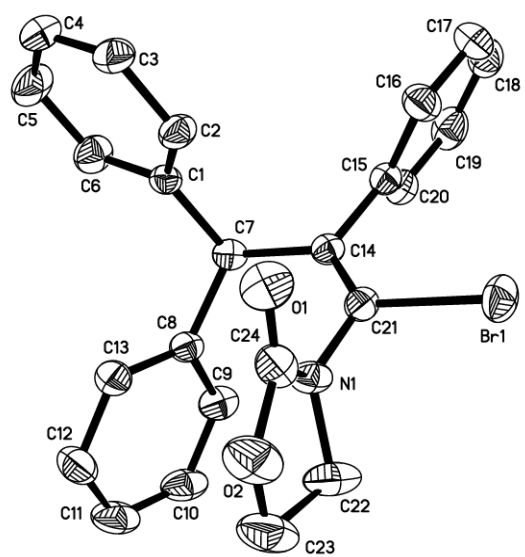

Supplement: c5ob01950h1.pdf [file c5ob01950h1.pdf]
